# Supplementary material
Source: PubMed Central journal article supplement (PMC6513703)
Supplement: NIHMS1020914-supplement-SI.pdf [file NIHMS1020914-supplement-SI.pdf]

*Supporting Information for:*

## **Validating the Biphilic Hypothesis of Nontrigonal P(III) Compounds**

Kyoungsoon Lee,<sup>‡#</sup> Anastasia V. Blake,<sup>‡#</sup> Akira Tanushi,<sup>†</sup> Sean M. McCarthy,<sup>§</sup> Daniel Kim,<sup>⊥</sup>  
Sydney M. Loria,<sup>⊥</sup> Courtney M. Donahue,<sup>‡</sup> Kyle D. Spielvogel,<sup>‡</sup> Jason M. Keith,<sup>\*⊥</sup> Scott R.  
Daly,<sup>\*‡</sup> Alexander T. Radosevich<sup>\*†</sup>

<sup>†</sup>*Department of Chemistry, Massachusetts Institute of Technology, Cambridge, Massachusetts 02139, United States*

<sup>‡</sup>*Department of Chemistry, The University of Iowa, E331 Chemistry Building, Iowa City, Iowa 52242-1294, United States*

<sup>§</sup>*Nalas Engineering Services, Inc., 85 Westbrook Rd., Centerbrook, Connecticut 06409*

<sup>⊥</sup>*Department of Chemistry, Colgate University, 13 Oak Drive, Hamilton, New York 13346, United States*

<sup>#</sup>*These authors contributed equally to this work.*

### **CONTENTS**

|                                                     |    |
|-----------------------------------------------------|----|
| I. General Methods.....                             | 2  |
| II. Synthesis and characterization.....             | 3  |
| III. Phosphorus K-edge XANES Methods and Data. .... | 4  |
| IV. Crystallographic Data.....                      | 7  |
| V. DFT and TDDFT Calculations. ....                 | 25 |
| VI. Multinuclear NMR Spectra.....                   | 49 |
| VII. References .....                               | 53 |

## I. General Methods.

All reagents were purchased from commercial vendors and used as received unless otherwise noted. Diethyl ether (Et<sub>2</sub>O), methylene chloride (CH<sub>2</sub>Cl<sub>2</sub>), tetrahydrofuran (THF), and pentane were dried according to the method of Grubbs<sup>1</sup> as modified by Bergman<sup>2</sup> using a Glass Contour Solvent Purification System. All glassware was oven-dried at 120 °C prior to use. All reactions were carried out under dry nitrogen atmosphere (Schlenk line or glovebox) unless otherwise noted. Solution NMR spectra were recorded on a VARIAN Inova-500 (500 MHz) spectrometer and processed with a MestReNova software. <sup>1</sup>H NMR chemical shifts (δ in ppm) were calibrated to the residual solvent peak (C<sub>6</sub>D<sub>6</sub>, δ 7.16 ppm). <sup>13</sup>C{<sup>1</sup>H} NMR shifts are given in ppm with respect to solvent residual peak (C<sub>6</sub>D<sub>6</sub>, δ 128.06 ppm). Coupling constants are reported as *J*-values in Hz. High resolution ESI mass spectra were obtained from the Mass Spectrometry Laboratory at the School of Chemical Sciences, University of Illinois at Urbana-Champaign. X-ray diffraction data was collected on a Bruker SMART APEX CCD area detector system equipped with a graphite monochromator and a MoK $\alpha$  fine-focus sealed tube ( $\lambda = 0.71073 \text{ \AA}$ ). Raw data integration and reduction were performed with the SAINT<sup>3</sup> and SADABS<sup>4</sup> programs. Structures were solved by direct methods using SHELXT<sup>5</sup> and refined by least-squares methods on F<sup>2</sup> using the SHELXL software package. All non-hydrogen atoms were refined with anisotropic displacement parameters. The hydrogen atoms attached to phosphorus were located in Fourier maps and were refined isotropically without constraints. All other hydrogen atoms were fixed in their ideal geometries. Graphical representations were generated in XP.

## II. Synthesis and characterization

Compounds  $\text{P}(\text{NMePh})_3$ ,<sup>6</sup> **1**,<sup>7</sup> **2**,<sup>8</sup> **2**•[Ru],<sup>8</sup> and **2**•[H][Ru]<sup>8</sup> were synthesized according to the literature procedures and characterized by <sup>1</sup>H and <sup>31</sup>P NMR spectroscopy prior to use. The crystal structure of  $\text{P}(\text{NMePh})_3$  (see Supporting Information Section IV for details) was determined to allow for comparison of its metrical parameters with cyclic analogues.

**Synthesis of 1•[H]<sub>2</sub>.** To a solution of **1**•[Cl]<sub>2</sub><sup>7</sup> (20 mg, 0.061 mmol) in tetrahydrofuran (5 mL) at –35 °C was added sodium cyanoborohydride (77 mg, 0.12 mmol) in one portion. The reaction mixture was stirred 1 h, then warmed to ambient temperature. The solvent was subsequently removed in vacuo. The solid residue was triturated with pentane, and the suspension was filtered over celite. The colorless filtrate was evaporated to give the product **1**•[H]<sub>2</sub> as a white solid (13 mg, 80 %). A single crystalline sample of **1**•[H]<sub>2</sub> was obtained from a concentrated pentane solution at –35°C.

<sup>1</sup>H NMR (500 MHz, C<sub>6</sub>D<sub>6</sub>) δ 7.40 (d, *J* = 7.6 Hz, 2H), 7.07 (d, *J* = 523 Hz, 2H), 7.03 – 6.93 (m, 4H), 6.51 (d, *J* = 7.2 Hz, 2H), 2.44 (d, *J* = 16.7 Hz, 6H). <sup>31</sup>P NMR (203 MHz, C<sub>6</sub>D<sub>6</sub>) δ –67.7 (triplet of septets, *J* = 523, 16.6 Hz). <sup>13</sup>C NMR (126 MHz, C<sub>6</sub>D<sub>6</sub>) δ 133.9 (d, *J* = 13.1 Hz), 131.8 (d, *J* = 14.6 Hz), 120.5, 119.8, 110.6 (d, *J* = 9.2 Hz), 108.7 (d, *J* = 7.2 Hz), 28.1 (d, *J* = 14.9 Hz). MS (ESI) calc'd for C<sub>14</sub>H<sub>16</sub>N<sub>3</sub>P (M<sup>+</sup>): 257.1082, found: 257.1078.

Although multinuclear NMR spectroscopy suggested an apparent *C*<sub>2v</sub> symmetry of **1**•[H]<sub>2</sub> in solution, X-ray diffraction of a colorless single crystal of **1**•[H]<sub>2</sub> gives evidence for a solid state structure of approximate *C*<sub>s</sub> symmetry. The geometry about the pentacoordinate phosphorus may be described as quasi-square pyramidal ( $\tau_5 = 0.33$ ),<sup>9</sup> where the two hydride ligands occupy inequivalent apical and basal positions ( $\angle\text{H}_1\text{-P-N}_2 = 98.3^\circ$  and  $\angle\text{H}_2\text{-P-N}_2 = 165.7^\circ$ ) and the chelating triamide binds at the remaining basal vacancies. The apparent discrepancy between the solution and solid state structures for **1**•[H]<sub>2</sub> can be rationalized by reference to DFT calculations (B3LYP/6-31G\*\*), which indicate a low energy *C*<sub>2v</sub> symmetric saddle point ( $E_{\text{rel}} = 5.8$  kcal/mol) along the PH<sub>2</sub> rocking coordinate connecting degenerate *C*<sub>s</sub> symmetric minima for **1**•[H]<sub>2</sub>, consistent with rapid interconversion and time-averaging on the NMR timescale.

### III. Phosphorus K-edge XANES Methods and Data.

**Overview.** Phosphorus K-edge X-ray absorption near-edge structure spectroscopy (XANES) is an element-specific technique that allows for direct measurement of unoccupied frontier orbital composition and energy by probing dipole-allowed transitions from the core P 1s  $\rightarrow$  empty orbitals containing phosphorus p character.<sup>10-11</sup> As such, phosphorus K-edge XANES is an ideal tool for extracting valuable information concerning electronic structure and chemical bonding in phosphorus compounds of diverse structure and composition.<sup>12</sup> For example, Szilagyι in collaboration with Peters and Mindiola used phosphorus K-edge XANES to help elucidate redox and magnetic contributions to electronic structure in metal diphosphine and pincer complexes.<sup>13-16</sup> More recent efforts by Daly and Keith used phosphorus K-edge XANES to determine how structural changes in phosphorus ligands give rise to relative differences in metal-phosphorus covalency.<sup>20</sup>

**XANES Sample Preparation.** P K-edge XANES samples were prepared in an N<sub>2</sub>-filled glovebox with <1.0 ppm O<sub>2</sub> by grinding crystalline P(NMePh)<sub>3</sub>, **1**, **1**•[H]<sub>2</sub>, **2**•[Ru], and **2**•[H][Ru] (ca. 10 mg) for 2 min using a Wig-L-Bug grinder and polystyrene capsules containing a Plexiglas pestle. The resulting powder for **1** and **1**•[H]<sub>2</sub> was dusted onto single-sided tape (40 μm) exposed through a 5 x 20 x 1 mm window on an aluminum plate using a series 237 Winsor & Newton University Bright brush. P K-edge XANES analysis of the tape, brush fibers, and Wig-L-Bug materials confirmed them to have no measurable phosphorus impurities. The samples were sealed behind two layers of polypropylene film (4 μm, SPEX CertiPrep) separated by an aluminum spacer (1 μm) and transported to the beamline in a sealed container under N<sub>2</sub>. The container was placed in a glovebag attached to the He-filled sample chamber, and the samples were quickly loaded into the sample chamber after the glovebag had purged for 30 minutes with inert gas (N<sub>2</sub> or He). Samples of P(NMePh)<sub>3</sub>, **2**•[Ru], and **2**•[H][Ru] were prepared similarly, but their data were first collected using a gas-flow cell designed at Iowa for air-sensitive XAS measurements in the tender X-ray region.<sup>20</sup> Subsequent P K-edge XANES data collected on **2**•[Ru] and **2**•[H][Ru] after brief exposure to air revealed no differences when compared to samples handled under rigorously air-free conditions.

**XANES Data Collection and Analysis.** All P K-edge XANES data were collected as previously described on BL 14-3 at the Stanford Synchrotron Radiation Lightsource (SSRL) in Menlo Park, CA under dedicated operating conditions of 3.0 GeV and 500 mA.<sup>17,2021-23</sup> BL 14-3 is equipped with a bending magnet source and a water-cooled double crystal Si(111) monochromator. The sample chamber and gas-flow cell (when used) were maintained under a slow purge of He during data collection. Data were collected in fluorescence mode using a PIPS detector in triplicate sets for each sample over three energy regions, as described previously.<sup>20</sup> The step sizes over the pre-edge (~2106-2140 eV), edge (~2140-2180 eV), and post-edge (~2180-2380 eV) were 1.0, 0.08, and 1.5 eV, respectively. A calibration scan was collected before and after each set of scans on Na<sub>4</sub>P<sub>2</sub>O<sub>7</sub> (2152.40 eV) or PPh<sub>4</sub>Br (2146.96 eV).<sup>24</sup> Calibrations, background subtraction, normalization, and averaging of individual scans were completed using the Athena program in the

IFEFIT XAS software package.<sup>25</sup> A first order polynomial was fit to the pre-edge region to remove the background from each scan. The background-subtracted scans were normalized by fitting a second or third order polynomial to the post-edge regions and setting the step function to an intensity of 1.0 at a set point of 2165 eV.

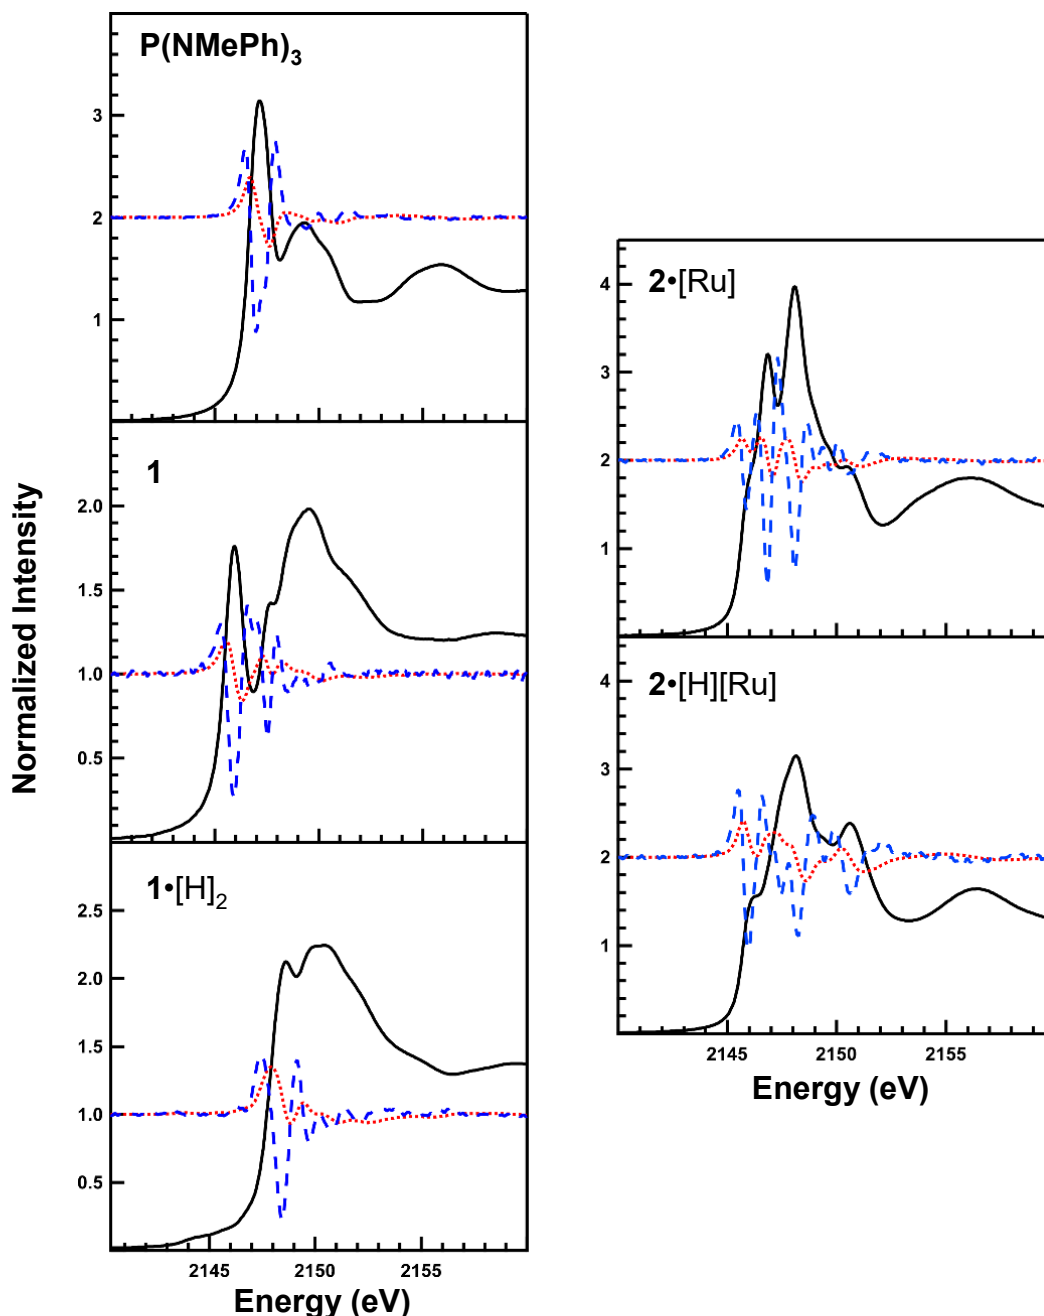

**Figure S1.** Comparison of P K-edge XANES spectra for  $P(NMePh)_3$ , **1**, and  $1 \cdot [H]_2$  (left) and  $2 \cdot [Ru]$ , and  $2 \cdot [H][Ru]$  (right). First (red; dotted line) and second (blue; dashed line) derivatives divided by 5 or 10 are offset on the y-axis by +1 or +2 intensity units.

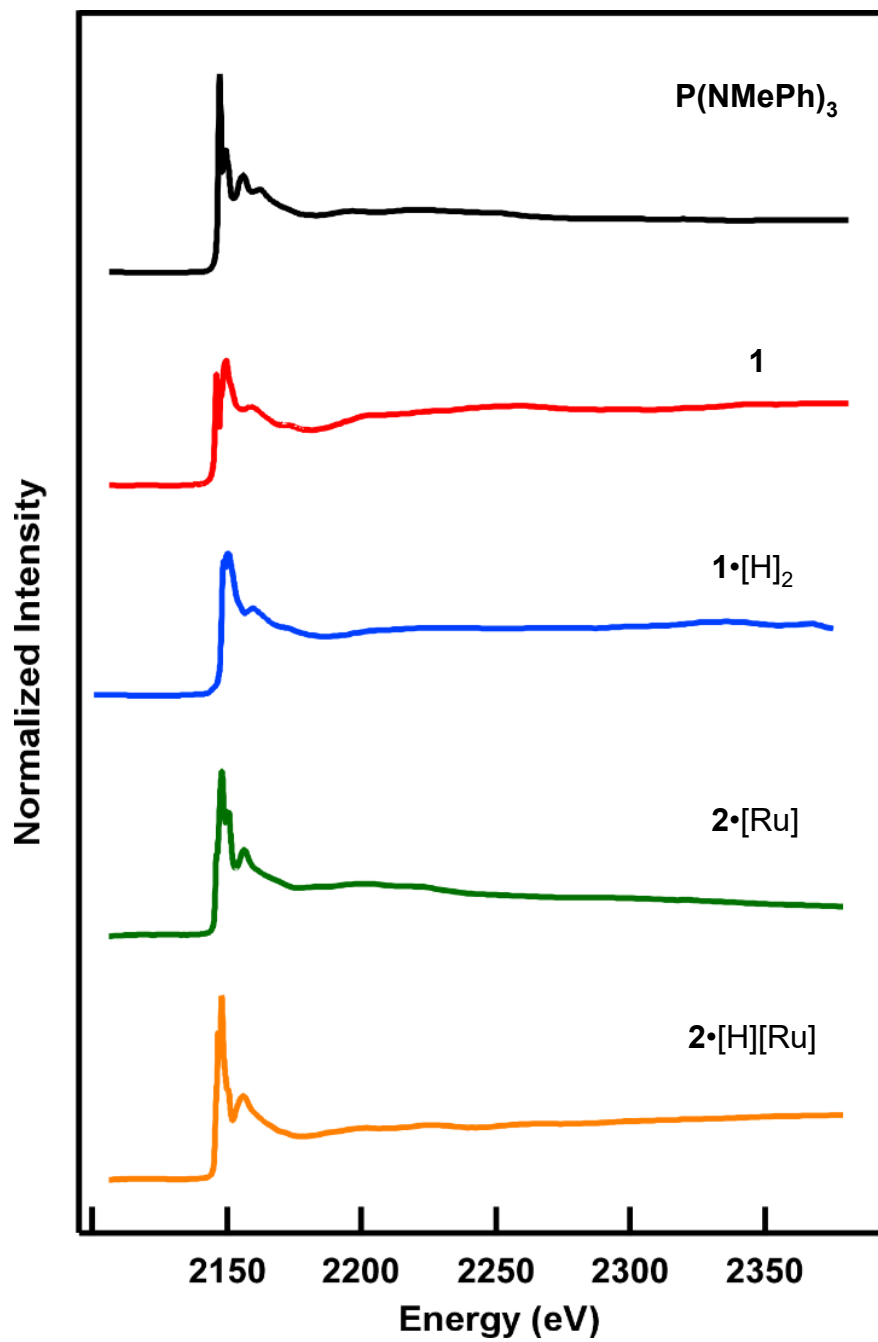

**Figure S2.** Complete background-subtracted and normalized P K-edge XANES spectra of P(NMePh)<sub>3</sub>, **1**, **1•[H]<sub>2</sub>**, **2•[Ru]**, and **2•[H][Ru]**.

#### IV. Crystallographic Data

**Table S1.** Selected Bond Distances (Å) and Angles (°) for P(NMePh)<sub>3</sub>, **1**, **1**•[H]<sub>2</sub>, **2**, **2**•[Ru], and **2**•[H][Ru].

| metric                                               | P(NMePh) <sub>3</sub> | <b>1</b> <sup>a</sup> | <b>1</b> •[H] <sub>2</sub> | <b>2</b> <sup>b</sup> | <b>2</b> •[Ru] <sup>b</sup> | <b>2</b> •[H][Ru] <sup>b</sup> |
|------------------------------------------------------|-----------------------|-----------------------|----------------------------|-----------------------|-----------------------------|--------------------------------|
| <i>d</i> (Ru <sub>1</sub> –P <sub>1</sub> )          |                       |                       |                            |                       | 2.1262(3)                   | 2.2509(4)                      |
| <i>d</i> (Ru <sub>1</sub> –P <sub>2</sub> )          |                       |                       |                            |                       | 2.3329(3)                   | 2.3359(4)                      |
| <i>d</i> (P <sub>1</sub> –N <sub>1</sub> )           | 1.7193(19)            | 1.7610(12)            | 1.7879(9)                  | 1.7485(8)             | 1.7085(9)                   | 1.7178(14)                     |
| <i>d</i> (P <sub>1</sub> –N <sub>2</sub> )           | 1.7193(19)            | 1.7190(13)            | 1.7098 (10)                | 1.7341(8)             | 1.7280(9)                   | 1.8362(14)                     |
| <i>d</i> (P <sub>1</sub> –N <sub>3</sub> )           | 1.7193(19)            | 1.7014(14)            | 1.7088(9)                  | 1.7786(8)             | 1.7135(9)                   | 1.8193(15)                     |
| ∠Ru <sub>1</sub> –P <sub>1</sub> –<br>N <sub>1</sub> |                       |                       |                            |                       | 147.62(3)                   | 140.14(6)                      |
| ∠N <sub>2</sub> –P <sub>1</sub> –<br>N <sub>3</sub>  | 101.33(9)             | 115.21(7)             | 146.00                     | 108.67(4)             | 113.94(4)                   | 170.74(7)                      |
| ∠N <sub>1</sub> –P <sub>1</sub> –<br>N <sub>2</sub>  | 101.33(9)             | 90.08(6)              | 86.14                      | 90.56(4)              | 91.40(4)                    | 86.59(7)                       |
| ∠N <sub>1</sub> –P <sub>1</sub> –<br>N <sub>3</sub>  | 101.33(9)             | 90.51(6)              | 86.32                      | 89.45(4)              | 92.04(4)                    | 87.25(7)                       |

<sup>a</sup> Data from Ref. 7.

<sup>b</sup> Data from Ref. 8.

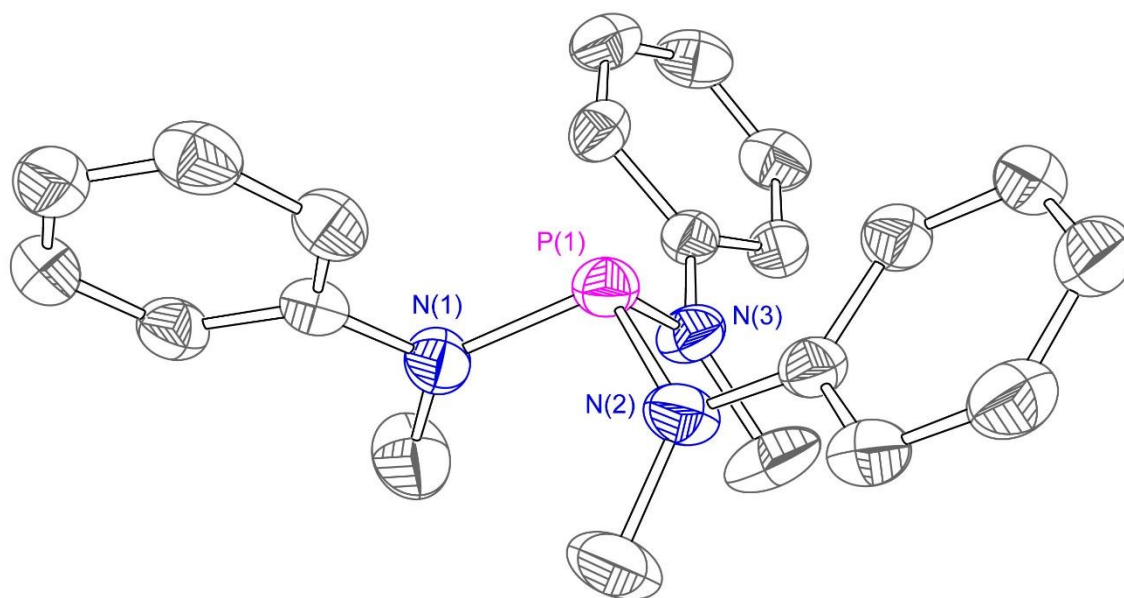

**Figure S3.** Solid-state structure of  $\text{P}(\text{NMePh})_3$ . Thermal ellipsoid plots rendered at the 50% probability level.

The X-ray structure of  $\text{P}(\text{NMePh})_3$  confirmed the  $C_3$  symmetric structure, where the angles ( $\angle\text{N-P-N} = 101.3^\circ$ ) and distances ( $d(\text{P-N})=1.719 \text{ \AA}$ ) are all equivalent in the primary bonding environment of phosphorus. The *N*-aryl moieties are displayed in all-*syn* helical fashion proximal to the phosphorus lone pair, with the less sterically demanding methyl substituents on the concave face of the trigonal pyramid.<sup>26</sup>



**Table S2.** Crystal data and structure refinement for P(NMePh)<sub>3</sub>.

|                                   |                                                  |           |
|-----------------------------------|--------------------------------------------------|-----------|
| Identification code               | smm8r                                            |           |
| Empirical formula                 | C <sub>21</sub> H <sub>24</sub> N <sub>3</sub> P |           |
| Formula weight                    | 349.40                                           |           |
| Temperature                       | 199(2) K                                         |           |
| Wavelength                        | 0.71073 Å                                        |           |
| Crystal system                    | Rhombohedral                                     |           |
| Space group                       | R3                                               |           |
| Unit cell dimensions              | a = 12.724(3) Å                                  | α = 90°.  |
|                                   | b = 12.724(3) Å                                  | β = 90°.  |
|                                   | c = 9.994(4) Å                                   | γ = 120°. |
| Volume                            | 1401.3(7) Å <sup>3</sup>                         |           |
| Z                                 | 3                                                |           |
| Density (calculated)              | 1.242 Mg/m <sup>3</sup>                          |           |
| Absorption coefficient            | 0.155 mm <sup>-1</sup>                           |           |
| F(000)                            | 558                                              |           |
| Crystal size                      | 0.23 x 0.22 x 0.16 mm <sup>3</sup>               |           |
| Theta range for data collection   | 2.75 to 28.25°.                                  |           |
| Index ranges                      | -15 ≤ h ≤ 16, -16 ≤ k ≤ 14, -8 ≤ l ≤ 13          |           |
| Reflections collected             | 2382                                             |           |
| Independent reflections           | 991 [R(int) = 0.0291]                            |           |
| Completeness to theta = 28.25°    | 99.1 %                                           |           |
| Absorption correction             | Semi-empirical from equivalents                  |           |
| Max. and min. transmission        | 0.9756 and 0.9652                                |           |
| Refinement method                 | Full-matrix least-squares on F <sup>2</sup>      |           |
| Data / restraints / parameters    | 991 / 1 / 77                                     |           |
| Goodness-of-fit on F <sup>2</sup> | 1.145                                            |           |
| Final R indices [I > 2σ(I)]       | R1 = 0.0348, wR2 = 0.1010                        |           |
| R indices (all data)              | R1 = 0.0352, wR2 = 0.1015                        |           |
| Absolute structure parameter      | 0.40(14)                                         |           |
| Largest diff. peak and hole       | 0.187 and -0.233 e.Å <sup>-3</sup>               |           |

**Table S3.** Atomic coordinates ( $\times 10^4$ ) and equivalent isotropic displacement parameters ( $\text{\AA}^2 \times 10^3$ ) for  $\text{P}(\text{NMePh})_3$ .  $U(\text{eq})$  is defined as one third of the trace of the orthogonalized  $U_{ij}$  tensor.

|      | x        | y       | z        | U(eq) |
|------|----------|---------|----------|-------|
| C(1) | 8987(2)  | 7586(2) | 8915(2)  | 34(1) |
| C(2) | 8186(2)  | 7523(2) | 7921(2)  | 40(1) |
| C(3) | 7466(2)  | 6452(2) | 7241(3)  | 48(1) |
| C(4) | 7495(2)  | 5411(2) | 7562(3)  | 51(1) |
| C(5) | 8250(3)  | 5452(2) | 8577(3)  | 49(1) |
| C(6) | 8994(2)  | 6520(2) | 9248(2)  | 41(1) |
| C(7) | 10408(3) | 8660(3) | 10751(3) | 65(1) |
| N(1) | 9759(2)  | 8691(2) | 9563(2)  | 40(1) |
| P(1) | 10000    | 10000   | 8790(1)  | 36(1) |

**Table S4.** Bond lengths [Å] and angles [°] for P(NMePh)<sub>3</sub>.

---

|                |            |
|----------------|------------|
| C(1)-C(2)      | 1.396(3)   |
| C(1)-C(6)      | 1.401(3)   |
| C(1)-N(1)      | 1.408(3)   |
| C(2)-C(3)      | 1.382(3)   |
| C(2)-H(2)      | 0.9300     |
| C(3)-C(4)      | 1.381(4)   |
| C(3)-H(3)      | 0.9300     |
| C(4)-C(5)      | 1.380(4)   |
| C(4)-H(4)      | 0.9300     |
| C(5)-C(6)      | 1.381(4)   |
| C(5)-H(5)      | 0.9300     |
| C(6)-H(6)      | 0.9300     |
| C(7)-N(1)      | 1.458(3)   |
| C(7)-H(7A)     | 0.9600     |
| C(7)-H(7B)     | 0.9600     |
| C(7)-H(7C)     | 0.9600     |
| N(1)-P(1)      | 1.7193(19) |
| P(1)-N(1)#1    | 1.7193(19) |
| P(1)-N(1)#2    | 1.7193(19) |
|                |            |
| C(2)-C(1)-C(6) | 118.1(2)   |
| C(2)-C(1)-N(1) | 120.64(19) |
| C(6)-C(1)-N(1) | 121.24(19) |
| C(3)-C(2)-C(1) | 120.7(2)   |
| C(3)-C(2)-H(2) | 119.6      |
| C(1)-C(2)-H(2) | 119.6      |
| C(4)-C(3)-C(2) | 120.6(2)   |
| C(4)-C(3)-H(3) | 119.7      |
| C(2)-C(3)-H(3) | 119.7      |
| C(5)-C(4)-C(3) | 119.2(2)   |
| C(5)-C(4)-H(4) | 120.4      |
| C(3)-C(4)-H(4) | 120.4      |
| C(4)-C(5)-C(6) | 121.0(2)   |
| C(4)-C(5)-H(5) | 119.5      |

|                    |            |
|--------------------|------------|
| C(6)-C(5)-H(5)     | 119.5      |
| C(5)-C(6)-C(1)     | 120.3(2)   |
| C(5)-C(6)-H(6)     | 119.8      |
| C(1)-C(6)-H(6)     | 119.8      |
| N(1)-C(7)-H(7A)    | 109.5      |
| N(1)-C(7)-H(7B)    | 109.5      |
| H(7A)-C(7)-H(7B)   | 109.5      |
| N(1)-C(7)-H(7C)    | 109.5      |
| H(7A)-C(7)-H(7C)   | 109.5      |
| H(7B)-C(7)-H(7C)   | 109.5      |
| C(1)-N(1)-C(7)     | 118.0(2)   |
| C(1)-N(1)-P(1)     | 117.24(15) |
| C(7)-N(1)-P(1)     | 124.33(17) |
| N(1)#1-P(1)-N(1)   | 101.33(9)  |
| N(1)#1-P(1)-N(1)#2 | 101.33(9)  |
| N(1)-P(1)-N(1)#2   | 101.33(9)  |

---

Symmetry transformations used to generate equivalent atoms:

#1  $-y+2, x-y+1, z$  #2  $-x+y+1, -x+2, z$

**Table S5.** Anisotropic displacement  $\text{\AA}^2 \times 10^3$ ) for  $\text{P}(\text{NMePh})_3$ . The anisotropic displacement factor exponent takes the form:  $-2\pi^2 [ h^2 a^{*2} U^{11} + \dots + 2 h k a^* b^* U^{12} ]$

|      | $U^{11}$ | $U^{22}$ | $U^{33}$ | $U^{23}$ | $U^{13}$ | $U^{12}$ |
|------|----------|----------|----------|----------|----------|----------|
| C(1) | 34(1)    | 41(1)    | 28(1)    | 4(1)     | 3(1)     | 18(1)    |
| C(2) | 37(1)    | 44(1)    | 38(1)    | 6(1)     | -2(1)    | 20(1)    |
| C(3) | 40(1)    | 55(1)    | 36(1)    | 3(1)     | -5(1)    | 15(1)    |
| C(4) | 55(1)    | 42(1)    | 40(1)    | -1(1)    | 4(1)     | 13(1)    |
| C(5) | 62(1)    | 41(1)    | 42(1)    | 6(1)     | 7(1)     | 25(1)    |
| C(6) | 47(1)    | 48(1)    | 33(1)    | 6(1)     | 2(1)     | 27(1)    |
| C(7) | 82(2)    | 58(2)    | 48(2)    | -1(1)    | -31(1)   | 30(1)    |
| N(1) | 49(1)    | 41(1)    | 34(1)    | 0(1)     | -9(1)    | 24(1)    |
| P(1) | 39(1)    | 39(1)    | 30(1)    | 0        | 0        | 20(1)    |

**Table S6.** Hydrogen coordinates ( $\times 10^4$ ) and isotropic displacement parameters ( $\text{\AA}^2 \times 10^{-3}$ ) for  $\text{P}(\text{NMePh})_3$ .

|       | x     | y    | z     | U(eq) |
|-------|-------|------|-------|-------|
| H(2)  | 8137  | 8210 | 7714  | 48    |
| H(3)  | 6958  | 6432 | 6560  | 57    |
| H(4)  | 7011  | 4692 | 7101  | 61    |
| H(5)  | 8259  | 4749 | 8811  | 59    |
| H(6)  | 9501  | 6532 | 9925  | 49    |
| H(7A) | 9837  | 8120 | 11400 | 98    |
| H(7B) | 10860 | 9460 | 11124 | 98    |
| H(7C) | 10956 | 8377 | 10510 | 98    |

**Table S7.** Torsion angles [°] for P(NMePh)<sub>3</sub>.

---

|                       |             |
|-----------------------|-------------|
| C(6)-C(1)-C(2)-C(3)   | -3.2(3)     |
| N(1)-C(1)-C(2)-C(3)   | 177.1(2)    |
| C(1)-C(2)-C(3)-C(4)   | 2.2(4)      |
| C(2)-C(3)-C(4)-C(5)   | 0.2(4)      |
| C(3)-C(4)-C(5)-C(6)   | -1.5(4)     |
| C(4)-C(5)-C(6)-C(1)   | 0.5(4)      |
| C(2)-C(1)-C(6)-C(5)   | 1.9(3)      |
| N(1)-C(1)-C(6)-C(5)   | -178.4(2)   |
| C(2)-C(1)-N(1)-C(7)   | 168.9(2)    |
| C(6)-C(1)-N(1)-C(7)   | -10.8(3)    |
| C(2)-C(1)-N(1)-P(1)   | -18.2(3)    |
| C(6)-C(1)-N(1)-P(1)   | 162.06(16)  |
| C(1)-N(1)-P(1)-N(1)#1 | -160.85(16) |
| C(7)-N(1)-P(1)-N(1)#1 | 11.5(3)     |
| C(1)-N(1)-P(1)-N(1)#2 | 95.0(2)     |
| C(7)-N(1)-P(1)-N(1)#2 | -92.6(2)    |

---

Symmetry transformations used to generate equivalent atoms:

#1 -y+2,x-y+1,z #2 -x+y+1,-x+2,z

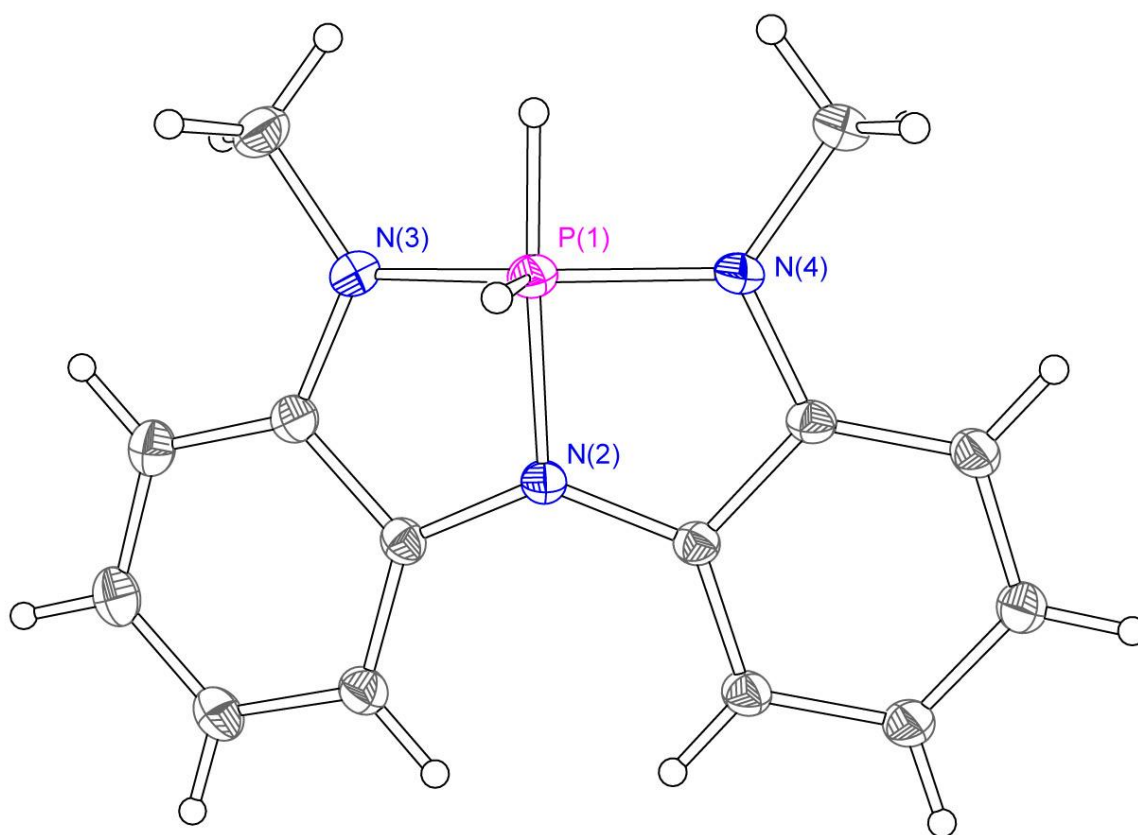

**Figure S4.** Solid state structure of 1•[H]<sub>2</sub>. Thermal ellipsoid plots rendered at the 50% probability level.



**Table S8.** Crystal data and structure refinement for **1**•[H]<sub>2</sub>

---

|                                   |                                                                                                      |
|-----------------------------------|------------------------------------------------------------------------------------------------------|
| Identification code               | PH2-16                                                                                               |
| Empirical formula                 | C <sub>14</sub> H <sub>16</sub> N <sub>3</sub> P                                                     |
| Formula weight                    | 257.27                                                                                               |
| Temperature                       | 100(2) K                                                                                             |
| Wavelength                        | 0.71073 Å                                                                                            |
| Crystal system                    | Trigonal                                                                                             |
| Space group                       | R-3                                                                                                  |
| Unit cell dimensions              | a = 29.7625(13) Å      α = 90°.<br>b = 29.7625(13) Å      β = 90°.<br>c = 7.5469(4) Å      γ = 120°. |
| Volume                            | 5789.5(6) Å <sup>3</sup>                                                                             |
| Z                                 | 18                                                                                                   |
| Density (calculated)              | 1.328 Mg/m <sup>3</sup>                                                                              |
| Absorption coefficient            | 0.199 mm <sup>-1</sup>                                                                               |
| F(000)                            | 2448                                                                                                 |
| Crystal size                      | 0.429 x 0.064 x 0.062 mm <sup>3</sup>                                                                |
| Theta range for data collection   | 1.368 to 34.031°.                                                                                    |
| Index ranges                      | -46<=h<=46, -46<=k<=46, -11<=l<=11                                                                   |
| Reflections collected             | 104083                                                                                               |
| Independent reflections           | 5163 [R(int) = 0.0482]                                                                               |
| Completeness to theta = 25.242°   | 99.9 %                                                                                               |
| Absorption correction             | Semi-empirical from equivalents                                                                      |
| Max. and min. transmission        | 0.7467 and 0.7008                                                                                    |
| Refinement method                 | Full-matrix least-squares on F <sup>2</sup>                                                          |
| Data / restraints / parameters    | 5163 / 0 / 171                                                                                       |
| Goodness-of-fit on F <sup>2</sup> | 1.054                                                                                                |
| Final R indices [I>2sigma(I)]     | R1 = 0.0373, wR2 = 0.0963                                                                            |
| R indices (all data)              | R1 = 0.0507, wR2 = 0.1037                                                                            |
| Extinction coefficient            | n/a                                                                                                  |
| Largest diff. peak and hole       | 0.525 and -0.299 e.Å <sup>-3</sup>                                                                   |

---

**Table S9.** Atomic coordinates (  $\times 10^4$ ) and equivalent isotropic displacement parameters ( $\text{\AA}^2 \times 10^3$ ) for  $\mathbf{1} \cdot [\text{H}]_2$ .  $U(\text{eq})$  is defined as one third of the trace of the orthogonalized  $U_{ij}$  tensor.

|       | x       | y       | z        | $U(\text{eq})$ |
|-------|---------|---------|----------|----------------|
| P(1)  | 4084(1) | 1721(1) | 8760(1)  | 17(1)          |
| N(2)  | 4330(1) | 1767(1) | 6566(1)  | 17(1)          |
| N(3)  | 4531(1) | 2366(1) | 8959(1)  | 18(1)          |
| N(4)  | 3496(1) | 1271(1) | 7912(1)  | 19(1)          |
| C(5)  | 4580(1) | 2677(1) | 10508(1) | 23(1)          |
| C(6)  | 3021(1) | 1030(1) | 8948(2)  | 24(1)          |
| C(11) | 4777(1) | 2232(1) | 6179(1)  | 15(1)          |
| C(12) | 5097(1) | 2385(1) | 4701(1)  | 18(1)          |
| C(13) | 5538(1) | 2881(1) | 4681(1)  | 22(1)          |
| C(14) | 5658(1) | 3217(1) | 6103(2)  | 22(1)          |
| C(15) | 5335(1) | 3068(1) | 7592(1)  | 20(1)          |
| C(16) | 4896(1) | 2580(1) | 7611(1)  | 16(1)          |
| C(21) | 3998(1) | 1370(1) | 5433(1)  | 16(1)          |
| C(22) | 4085(1) | 1233(1) | 3756(1)  | 20(1)          |
| C(23) | 3678(1) | 803(1)  | 2904(2)  | 22(1)          |
| C(24) | 3197(1) | 518(1)  | 3700(2)  | 23(1)          |
| C(25) | 3106(1) | 654(1)  | 5385(2)  | 21(1)          |
| C(26) | 3507(1) | 1077(1) | 6243(1)  | 17(1)          |

**Table S10.** Bond lengths [ $\text{\AA}$ ] and angles [ $^\circ$ ] for **1**•[H]<sub>2</sub>.

---

|                  |            |
|------------------|------------|
| P(1)-N(3)        | 1.7088(9)  |
| P(1)-N(4)        | 1.7098(10) |
| P(1)-N(2)        | 1.7879(9)  |
| N(2)-C(11)       | 1.3892(13) |
| N(2)-C(21)       | 1.3918(13) |
| N(3)-C(16)       | 1.3886(12) |
| N(3)-C(5)        | 1.4529(13) |
| N(4)-C(26)       | 1.3929(13) |
| N(4)-C(6)        | 1.4521(13) |
| C(11)-C(12)      | 1.3876(13) |
| C(11)-C(16)      | 1.4129(13) |
| C(12)-C(13)      | 1.4025(15) |
| C(13)-C(14)      | 1.3864(15) |
| C(14)-C(15)      | 1.3990(15) |
| C(15)-C(16)      | 1.3860(14) |
| C(21)-C(22)      | 1.3927(14) |
| C(21)-C(26)      | 1.4135(14) |
| C(22)-C(23)      | 1.4031(15) |
| C(23)-C(24)      | 1.3838(16) |
| C(24)-C(25)      | 1.4020(16) |
| C(25)-C(26)      | 1.3886(15) |
|                  |            |
| N(3)-P(1)-N(4)   | 146.00(5)  |
| N(3)-P(1)-N(2)   | 86.32(4)   |
| N(4)-P(1)-N(2)   | 86.14(4)   |
| C(11)-N(2)-C(21) | 129.54(8)  |
| C(11)-N(2)-P(1)  | 114.98(7)  |
| C(21)-N(2)-P(1)  | 114.51(7)  |
| C(16)-N(3)-C(5)  | 119.33(9)  |
| C(16)-N(3)-P(1)  | 116.27(7)  |
| C(5)-N(3)-P(1)   | 124.07(7)  |
| C(26)-N(4)-C(6)  | 120.05(9)  |
| C(26)-N(4)-P(1)  | 115.85(7)  |
| C(6)-N(4)-P(1)   | 123.20(8)  |

|                   |            |
|-------------------|------------|
| C(12)-C(11)-N(2)  | 130.79(9)  |
| C(12)-C(11)-C(16) | 119.72(9)  |
| N(2)-C(11)-C(16)  | 109.49(8)  |
| C(11)-C(12)-C(13) | 118.77(9)  |
| C(14)-C(13)-C(12) | 121.26(10) |
| C(13)-C(14)-C(15) | 120.33(10) |
| C(16)-C(15)-C(14) | 118.62(9)  |
| C(15)-C(16)-N(3)  | 126.91(9)  |
| C(15)-C(16)-C(11) | 121.28(9)  |
| N(3)-C(16)-C(11)  | 111.81(9)  |
| N(2)-C(21)-C(22)  | 130.54(9)  |
| N(2)-C(21)-C(26)  | 109.47(8)  |
| C(22)-C(21)-C(26) | 119.99(9)  |
| C(21)-C(22)-C(23) | 118.72(10) |
| C(24)-C(23)-C(22) | 121.16(10) |
| C(23)-C(24)-C(25) | 120.51(10) |
| C(26)-C(25)-C(24) | 118.79(10) |
| C(25)-C(26)-N(4)  | 127.60(10) |
| C(25)-C(26)-C(21) | 120.84(9)  |
| N(4)-C(26)-C(21)  | 111.55(9)  |

---

Symmetry transformations used to generate equivalent atoms:

**Table S11.** Anisotropic displacement parameters ( $\text{\AA}^2 \times 10^3$ ) for  $\mathbf{1} \cdot [\text{H}]_2$ . The anisotropic displacement factor exponent takes the form:  $-2\pi^2 [ h^2 a^{*2} U^{11} + \dots + 2 h k a^* b^* U^{12} ]$

|       | $U^{11}$ | $U^{22}$ | $U^{33}$ | $U^{23}$ | $U^{13}$ | $U^{12}$ |
|-------|----------|----------|----------|----------|----------|----------|
| P(1)  | 19(1)    | 17(1)    | 14(1)    | 1(1)     | 3(1)     | 8(1)     |
| N(2)  | 18(1)    | 16(1)    | 14(1)    | -1(1)    | 2(1)     | 6(1)     |
| N(3)  | 21(1)    | 18(1)    | 14(1)    | -1(1)    | 4(1)     | 8(1)     |
| N(4)  | 18(1)    | 19(1)    | 19(1)    | 1(1)     | 4(1)     | 8(1)     |
| C(5)  | 26(1)    | 23(1)    | 17(1)    | -4(1)    | 3(1)     | 10(1)    |
| C(6)  | 20(1)    | 24(1)    | 25(1)    | 4(1)     | 7(1)     | 10(1)    |
| C(11) | 17(1)    | 15(1)    | 14(1)    | 1(1)     | 1(1)     | 9(1)     |
| C(12) | 22(1)    | 17(1)    | 14(1)    | 1(1)     | 3(1)     | 9(1)     |
| C(13) | 25(1)    | 18(1)    | 19(1)    | 2(1)     | 7(1)     | 8(1)     |
| C(14) | 25(1)    | 16(1)    | 22(1)    | 0(1)     | 5(1)     | 7(1)     |
| C(15) | 24(1)    | 16(1)    | 18(1)    | -1(1)    | 2(1)     | 8(1)     |
| C(16) | 19(1)    | 16(1)    | 14(1)    | 1(1)     | 2(1)     | 10(1)    |
| C(21) | 18(1)    | 15(1)    | 16(1)    | 0(1)     | -1(1)    | 9(1)     |
| C(22) | 22(1)    | 19(1)    | 17(1)    | -2(1)    | 0(1)     | 10(1)    |
| C(23) | 26(1)    | 21(1)    | 20(1)    | -4(1)    | -3(1)    | 11(1)    |
| C(24) | 23(1)    | 19(1)    | 25(1)    | -3(1)    | -6(1)    | 9(1)     |
| C(25) | 18(1)    | 18(1)    | 25(1)    | 0(1)     | -2(1)    | 8(1)     |
| C(26) | 18(1)    | 17(1)    | 18(1)    | 1(1)     | 1(1)     | 10(1)    |

**Table S12.** Hydrogen coordinates ( $\times 10^4$ ) and isotropic displacement parameters ( $\text{\AA}^2 \times 10^{-3}$ ) for  $1 \cdot [\text{H}]_2$ .

|       | x       | y       | z         | U(eq) |
|-------|---------|---------|-----------|-------|
| H(1A) | 3854(6) | 1757(6) | 10220(19) | 20    |
| H(1B) | 4286(6) | 1456(6) | 9496(19)  | 20    |
| H(5A) | 4891    | 2747    | 11176     | 34    |
| H(5B) | 4273    | 2488    | 11261     | 34    |
| H(5C) | 4610    | 3006    | 10131     | 34    |
| H(6A) | 2731    | 983     | 8206      | 35    |
| H(6B) | 3058    | 1252    | 9959      | 35    |
| H(6C) | 2955    | 692     | 9378      | 35    |
| H(12) | 5018    | 2157    | 3721      | 22    |
| H(13) | 5759    | 2989    | 3673      | 26    |
| H(14) | 5961    | 3550    | 6066      | 27    |
| H(15) | 5415    | 3297    | 8570      | 24    |
| H(22) | 4414    | 1427    | 3200      | 24    |
| H(23) | 3733    | 707     | 1760      | 27    |
| H(24) | 2927    | 228     | 3101      | 28    |
| H(25) | 2775    | 460     | 5930      | 25    |

**Table S13.** Torsion angles [ $^{\circ}$ ] for **1**•[H]<sub>2</sub>.

---

|                         |             |
|-------------------------|-------------|
| N(3)-P(1)-N(2)-C(11)    | 9.03(8)     |
| N(4)-P(1)-N(2)-C(11)    | 155.85(8)   |
| N(3)-P(1)-N(2)-C(21)    | -160.83(8)  |
| N(4)-P(1)-N(2)-C(21)    | -14.01(7)   |
| N(4)-P(1)-N(3)-C(16)    | -87.50(10)  |
| N(2)-P(1)-N(3)-C(16)    | -9.98(8)    |
| N(4)-P(1)-N(3)-C(5)     | 99.16(11)   |
| N(2)-P(1)-N(3)-C(5)     | 176.68(9)   |
| N(3)-P(1)-N(4)-C(26)    | 91.91(10)   |
| N(2)-P(1)-N(4)-C(26)    | 14.34(8)    |
| N(3)-P(1)-N(4)-C(6)     | -98.95(11)  |
| N(2)-P(1)-N(4)-C(6)     | -176.53(9)  |
| C(21)-N(2)-C(11)-C(12)  | -18.70(18)  |
| P(1)-N(2)-C(11)-C(12)   | 173.29(9)   |
| C(21)-N(2)-C(11)-C(16)  | 162.05(10)  |
| P(1)-N(2)-C(11)-C(16)   | -5.96(10)   |
| N(2)-C(11)-C(12)-C(13)  | -178.22(10) |
| C(16)-C(11)-C(12)-C(13) | 0.97(15)    |
| C(11)-C(12)-C(13)-C(14) | 0.15(17)    |
| C(12)-C(13)-C(14)-C(15) | -0.70(18)   |
| C(13)-C(14)-C(15)-C(16) | 0.10(17)    |
| C(14)-C(15)-C(16)-N(3)  | -179.79(10) |
| C(14)-C(15)-C(16)-C(11) | 1.05(16)    |
| C(5)-N(3)-C(16)-C(15)   | 3.32(16)    |
| P(1)-N(3)-C(16)-C(15)   | -170.35(9)  |
| C(5)-N(3)-C(16)-C(11)   | -177.45(9)  |
| P(1)-N(3)-C(16)-C(11)   | 8.88(11)    |
| C(12)-C(11)-C(16)-C(15) | -1.60(15)   |
| N(2)-C(11)-C(16)-C(15)  | 177.75(9)   |
| C(12)-C(11)-C(16)-N(3)  | 179.13(9)   |
| N(2)-C(11)-C(16)-N(3)   | -1.53(12)   |
| C(11)-N(2)-C(21)-C(22)  | 23.11(18)   |
| P(1)-N(2)-C(21)-C(22)   | -168.83(9)  |
| C(11)-N(2)-C(21)-C(26)  | -157.73(10) |

|                         |             |
|-------------------------|-------------|
| P(1)-N(2)-C(21)-C(26)   | 10.32(10)   |
| N(2)-C(21)-C(22)-C(23)  | 179.11(10)  |
| C(26)-C(21)-C(22)-C(23) | 0.03(15)    |
| C(21)-C(22)-C(23)-C(24) | -0.01(16)   |
| C(22)-C(23)-C(24)-C(25) | 0.22(17)    |
| C(23)-C(24)-C(25)-C(26) | -0.46(16)   |
| C(24)-C(25)-C(26)-N(4)  | -179.52(10) |
| C(24)-C(25)-C(26)-C(21) | 0.48(15)    |
| C(6)-N(4)-C(26)-C(25)   | -1.21(16)   |
| P(1)-N(4)-C(26)-C(25)   | 168.29(9)   |
| C(6)-N(4)-C(26)-C(21)   | 178.79(9)   |
| P(1)-N(4)-C(26)-C(21)   | -11.71(11)  |
| N(2)-C(21)-C(26)-C(25)  | -179.54(9)  |
| C(22)-C(21)-C(26)-C(25) | -0.28(15)   |
| N(2)-C(21)-C(26)-N(4)   | 0.47(12)    |
| C(22)-C(21)-C(26)-N(4)  | 179.73(9)   |

---

Symmetry transformations used to generate equivalent atoms:



## V. DFT and TDDFT Calculations.

All species were modeled as previously described<sup>20-22</sup> with the B3LYP-D3 flavor of density functional theory as implemented by Gaussian09.<sup>27</sup> This functional combines Becke's three-parameter exchange functional<sup>28</sup> with the correlation functional of Lee, Yang and Parr.<sup>29</sup> Empirical dispersion corrections were added with Grimme's D3 protocol.<sup>30</sup> Nonmetals were modeled with Pople's split-valence double- $\zeta$  plus polarization basis set 6-31G(d,p).<sup>31,32</sup> Ru was modeled with the effective core potential of Hay and Wadt<sup>33</sup> and the accompanying uncontracted basis set<sup>34</sup> augmented with f polarization functions<sup>35</sup> collectively known as LANL08(f). All species were modeled in the gas phase. Time-dependent density functional theory (TDDFT) calculations were subsequently performed as described previously<sup>20,22</sup> in order to approximate excitation energies and amplitudes (oscillator strengths) for specific excited states, as well as to simulate the P K-edge XAS data. As previously discussed,<sup>20</sup> an energy shift of +49.6 eV was applied to the calculated spectra to account for the errors in the accuracy of the simulated spectra in including these errors as well as errors associated with relativistic effects and general inaccuracy of the functional. The scalar energy shift was determined by comparing the experimental and calculated energies of the first feature in each spectra. Natural transition orbital analysis was performed on the TDDFT generated transition densities to further validate the assignments of individual excitations in the simulated spectra.<sup>36</sup>

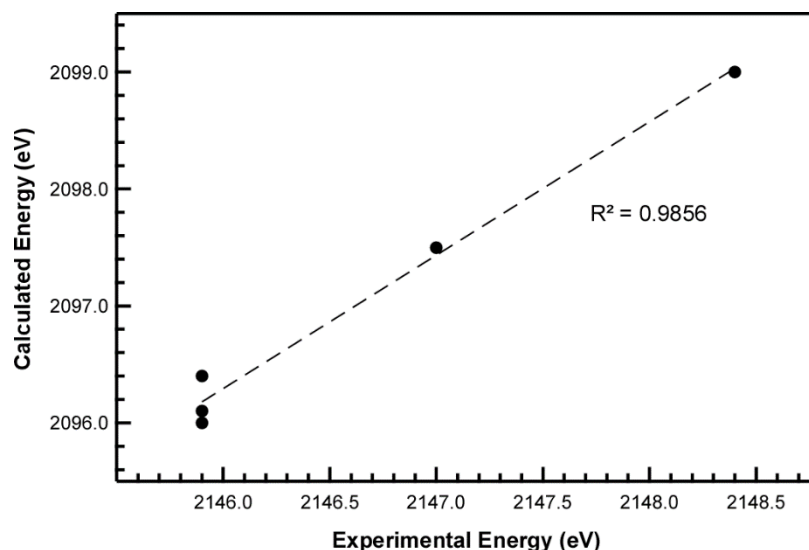

**Figure S5.** Correlation plot of the unshifted calculated (TDDFT) and experimental energies of the first feature in the P K-edge XAS spectra of  $\text{P}(\text{NMePh})_3$ ,  $1$ ,  $1\cdot[\text{H}]_2$ ,  $2\cdot[\text{Ru}]$ , and  $2\cdot[\text{H}][\text{Ru}]$ .

**Table S14.** Experimental and calculated (TDDFT) P K-edge XANES peak positions (eV). Peak positions were determined by analysis of the 2<sup>nd</sup> derivative trace of the experimental and simulated spectra.

| P(NMePh) <sub>3</sub> |        | 1      |        | 1•[H] <sub>2</sub> |        | 2•[Ru] |        | 2•[H][Ru] |        |
|-----------------------|--------|--------|--------|--------------------|--------|--------|--------|-----------|--------|
| Expt                  | Calc   | Expt   | Calc   | Expt               | Calc   | Expt   | Calc   | Expt      | Calc   |
| 2147.0                | 2147.1 | 2145.9 | 2146.0 | 2148.4             | 2148.6 | 2145.9 | 2145.6 | 2145.9    | 2145.7 |
| 2147.4                |        | 2147.5 | 2147.7 | 2149.7             | 2149.5 |        | 2145.8 |           | 2146.1 |
| 2148.6                | 2148.4 | 2148.4 | 2148.1 | 2150.7             | 2150.5 |        | 2146.1 | 2147.0    | 2146.6 |
| 2149.4                | 2149.5 | 2148.6 | 2148.9 |                    | 2150.8 | 2146.8 | 2146.9 |           | 2147.0 |
|                       | 2151.0 | 2149.6 | 2149.6 |                    | 2151.3 |        | 2147.5 |           | 2147.2 |
|                       |        |        | 2150.6 |                    |        | 2148.1 | 2147.9 | 2147.5    | 2148.0 |
|                       |        |        |        |                    |        |        | 2148.2 | 2148.2    | 2148.3 |
|                       |        |        |        |                    |        | 2149.0 | 2148.7 |           | 2149.1 |
|                       |        |        |        |                    |        | 2149.7 | 2149.4 | 2149.5    | 2149.4 |

**Table S15.** Calculated P 3p orbital composition and energy of selected MOs in P(NMePh)<sub>3</sub>, C<sub>2v</sub>-**1**, **1**, and **1**•[H]<sub>2</sub>. The dashed line indicates the break between occupied and unoccupied MOs (HOMO/LUMO gap).

| P(NMePh) <sub>3</sub> |          |       | C <sub>2v</sub> - <b>1</b> |          |       | <b>1</b> |          |       | <b>1</b> •[H] <sub>2</sub> |          |       |       |
|-----------------------|----------|-------|----------------------------|----------|-------|----------|----------|-------|----------------------------|----------|-------|-------|
| MO                    | E (eV)   | P 3p  | MO                         | E (eV)   | P 3p  | MO       | E (eV)   | P 3p  | MO                         | E (eV)   | P 3p  | H 1s  |
| 104                   | 2.70     | 2.6%  | 78                         | 3.71     | 20.3% | 78       | 3.41     | 30.2% | 79                         | 3.39     | 2.0%  | 0.3%  |
| 103                   | 2.58     | 10.7% | 77                         | 3.16     | 4.9%  | 77       | 3.25     | 1.2%  | 78                         | 3.29     | 19.5% | 21.4% |
| 102                   | 2.02     | 2.2%  | 76                         | 3.05     | 12.3% | 76       | 2.85     | 2.6%  | 77                         | 2.97     | 20.9% | -     |
| 101                   | 1.49     | 53.2% | 75                         | 2.74     | 6.8%  | 75       | 2.75     | 4.2%  | 76                         | 2.65     | 2.5%  | 7.4%  |
| 100                   | 1.40     | 47.4% | 74                         | 2.56     | 6.3%  | 74       | 2.35     | 3.6%  | 75                         | 2.51     | 45.6% | -     |
| 99                    | 0.49     | 2.3%  | 73                         | 1.63     | 56.2% | 73       | 1.91     | 64.1% | 74                         | 2.24     | 11.4% | 15.3% |
| 98                    | 0.29     | 7.7%  | 72                         | 0.92     | 2.6%  | 72       | 0.55     | 7.7%  | 73                         | 1.41     | 27.5% | 5.6%  |
| 97                    | 0.19     | 1.4%  | 71                         | 0.63     | 4.4%  | 71       | 0.44     | 8.8%  | 72                         | 1.04     | 1.4%  | 0.4%  |
| 96                    | 0.13     | 2.2%  | 70                         | 0.58     | -     | 70       | 0.38     | 5.9%  | 71                         | 0.65     | 2.9%  | -     |
| 95                    | 0.03     | 7.7%  | 69                         | -0.19    | 0.2%  | 69       | 0.14     | 4.1%  | 70                         | 0.23     | 9.9%  | 1.8%  |
| 94                    | -0.06    | 5.6%  | 68                         | -1.70    | 43.8% | 68       | -0.39    | 56.5% | 69                         | 0.07     | 1.2%  | -     |
| 93                    | -5.07    | 4.6%  | 67                         | -5.14    | 0.4%  | 67       | -4.97    | 6.1%  | 68                         | -4.73    | 1.4%  | 5.0%  |
| 92                    | -5.58    | 1.7%  | 66                         | -5.77    | 23.7% | 66       | -5.35    | 1.5%  | 67                         | -5.46    | 1.0%  | -     |
| 91                    | -5.83    | 2.0%  | 65                         | -5.89    | 18.6% | 65       | -6.16    | 0.5%  | 66                         | -5.94    | 0.6%  | 1.5%  |
| 90                    | -6.53    | 6.3%  | 64                         | -6.13    | 10.4% | 64       | -6.57    | 0.1%  | 65                         | -6.60    | -     | -     |
| 89                    | -6.62    | 0.5%  | 63                         | -6.90    | 0.1%  | 63       | -7.22    | 25.3% | 64                         | -7.72    | 1.4%  | 17.6% |
| 88                    | -6.72    | 2.1%  |                            |          |       |          |          |       | 43                         | -12.86   | 9.0%  | 5.6%  |
| 87                    | -6.96    | 18.4% |                            |          |       |          |          |       | 42                         | -13.17   | 20.9% | 11.4% |
| P 1s                  | -2098.88 |       | P 1s                       | -2098.40 |       | P 1s     | -2099.00 |       | P 1s                       | -2100.21 |       |       |

**Table S16.** Calculated P and Ru orbital composition and energy of selected MOs from  $2\bullet[\text{Ru}]$  and  $2\bullet[\text{H}][\text{Ru}]$ .

|                                 | MO   | E (eV)   | P 3p (2) | P 3p (PPh <sub>3</sub> ) | Ru 5s | Ru 5p | Ru 4d | H 1s  |      |
|---------------------------------|------|----------|----------|--------------------------|-------|-------|-------|-------|------|
| $2\bullet[\text{Ru}]$           | 216  | 2.29     | -        | 23.0%                    | 10.0% | 12.5% | 0.9%  | -     |      |
|                                 | 215  | 1.97     | 22.0%    | 0.1%                     | -     | 24.4% | 0.8%  | -     |      |
|                                 | 212  | 1.56     | 24.3%    | 3.4%                     | -     | 42.0% | 2.0%  | -     |      |
|                                 | 210  | 0.81     | 43.3%    | 0.6%                     | -     | 4.2%  | 11.2% | -     |      |
|                                 | 201  | -0.46    | 3.3%     | 0.7%                     | -     | 0.9%  | 9.8%  | -     |      |
|                                 | 199  | -0.57    | 2.2%     | 2.7%                     | 0.1%  | 0.5%  | 8.9%  | -     |      |
|                                 | 198  | -0.64    | 1.3%     | 2.0%                     | 0.1%  | 0.2%  | 8.5%  | -     |      |
|                                 | 197  | -0.71    | 4.3%     | 3.9%                     | 0.6%  | 1.4%  | 15.5% | -     |      |
|                                 | 196  | -0.90    | 1.9%     | 0.5%                     | 0.1%  | 0.2%  | 2.2%  | -     |      |
|                                 | 195  | -0.90    | 2.4%     | 0.6%                     | -     | 0.8%  | 1.7%  | -     |      |
| LUMO                            | 194  | -1.36    | 1.9%     | -                        | -     | 0.8%  | 4.6%  | -     |      |
| HOMO                            | 193  | -5.05    | 0.6%     | -                        | 0.1%  | 1.0%  | 46.8% | -     |      |
|                                 | 192  | -5.13    | 0.6%     | 0.1%                     | -     | 0.4%  | 47.8% | -     |      |
|                                 | 191  | -5.53    | 0.5%     | 0.1%                     | 0.1%  | 2.2%  | 29.0% | -     |      |
|                                 | 151  | -10.54   | 9.7%     | -                        | 1.1%  | 0.4%  | 5.4%  | -     |      |
| P 1s (PPh <sub>3</sub> )        |      | -2097.92 |          |                          |       |       |       |       |      |
| P 1s (2)                        |      | -2099.87 |          |                          |       |       |       |       |      |
| $2\bullet[\text{H}][\text{Ru}]$ | 224  | 3.33     | 4.7%     | 4.3%                     | 21.1% | 10.4% | 0.4%  | 7.5%  |      |
|                                 | 207  | 0.51     | 1.6%     | 0.1%                     | 2.1%  | 13.2% | 8.8%  | 4.1%  |      |
|                                 | 204  | 0.27     | 0.4%     | 2.1%                     | 2.0%  | 7.2%  | 17.3% | 0.1%  |      |
|                                 | 202  | -0.09    | 1.6%     | 3.5%                     | 2.4%  | 1.1%  | 10.8% | 0.2%  |      |
|                                 | 201  | -0.22    | 2.5%     | 1.0%                     | 2.4%  | 1.1%  | 8.8%  | 0.7%  |      |
|                                 | 200  | -0.28    | 0.4%     | 0.7%                     | 0.5%  | 0.7%  | 1.6%  | 0.1%  |      |
|                                 | 199  | -0.42    | 1.7%     | 2.4%                     | 0.4%  | 0.3%  | 7.4%  | 0.3%  |      |
|                                 | 198  | -0.48    | 2.4%     | 1.4%                     | 0.2%  | -     | 6.3%  | -     |      |
|                                 | 197  | -0.60    | 0.3%     | 2.1%                     | 0.2%  | 0.9%  | 9.2%  | 0.5%  |      |
|                                 | 196  | -0.71    | 2.8%     | 2.3%                     | -     | 0.5%  | 4.4%  | 0.1%  |      |
|                                 | 195  | -0.80    | 0.2%     | 7.2%                     | 0.1%  | -     | 1.3%  | -     |      |
|                                 | 194  | -1.01    | 0.7%     | 0.4%                     | 0.2%  | 2.0%  | 1.6%  | 1.2%  |      |
|                                 | LUMO | 193      | -1.22    | 0.4%                     | 1.6%  | 0.1%  | 1.0%  | 5.0%  | 0.1% |
|                                 | HOMO | 192      | -4.62    | 0.2%                     | 0.1%  | 0.4%  | 1.6%  | 4.6%  | 3.0% |
|                                 |      | 191      | -5.27    | 0.1%                     | -     | 0.1%  | 0.1%  | 18.2% | 0.1% |
|                                 |      | 190      | -5.66    | 0.2%                     | 0.3%  | 0.3%  | 1.9%  | 33.8% | 0.7% |
|                                 |      | 189      | -5.83    | -                        | -     | 0.1%  | 1.6%  | 25.7% | 0.2% |
|                                 |      | 188      | -5.92    | -                        | 0.3%  | 0.1%  | 0.3%  | 6.0%  | 0.1% |
|                                 |      | 187      | -6.25    | 1.9%                     | 2.4%  | 0.3%  | 2.1%  | 43.2% | 0.8% |
|                                 |      | 155      | -10.01   | 8.3%                     | 0.1%  | 0.8%  | 0.4%  | 3.4%  | 2.6% |
| 120                             |      | -13.29   | 14.1%    | 0.1%                     | -     | -     | 0.9%  | 8.7%  |      |
| P 1s (PPh <sub>3</sub> )        |      | -2098.19 |          |                          |       |       |       |       |      |
| P 1s (2)                        |      | -2099.41 |          |                          |       |       |       |       |      |



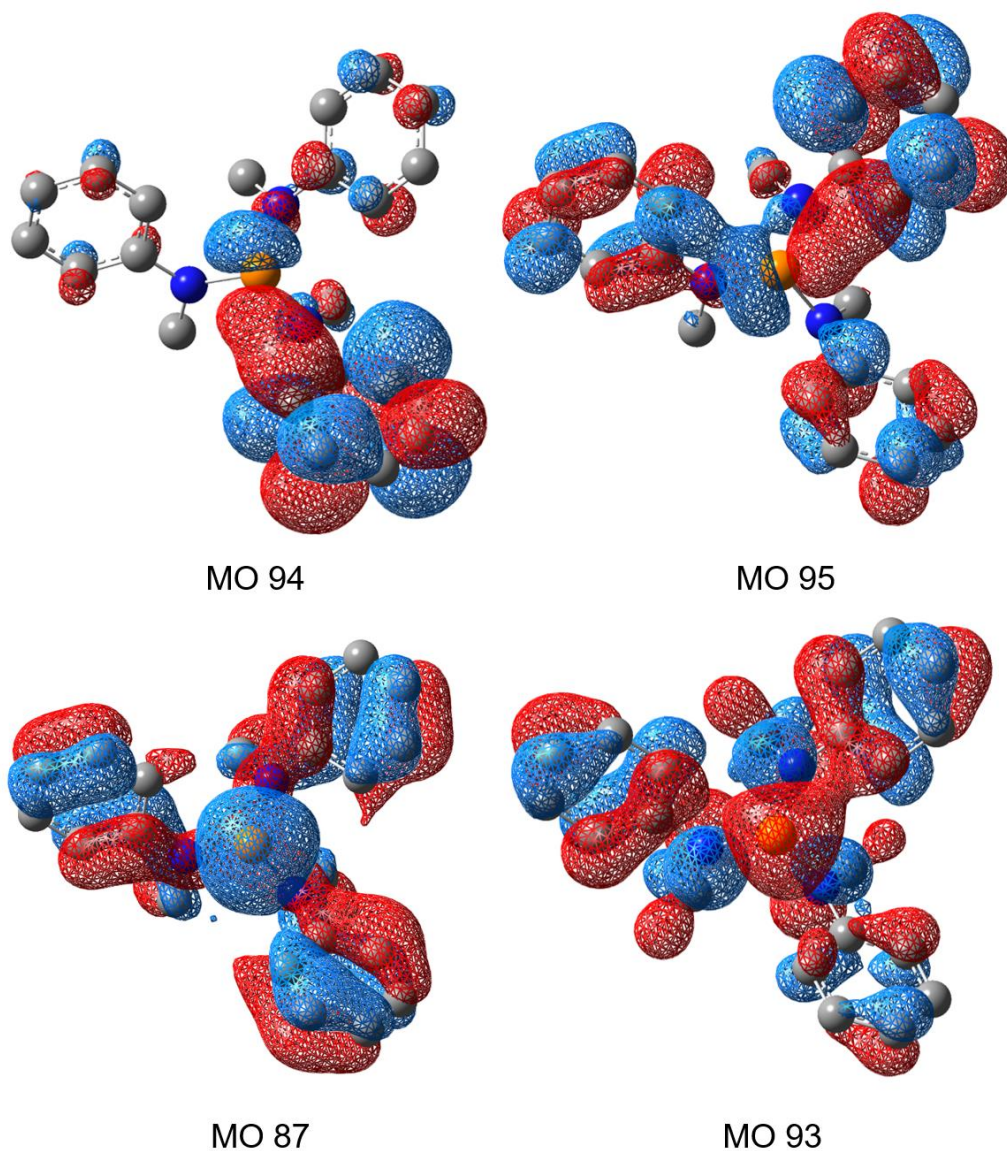

**Figure S6.** Kohn-Sham orbitals for MOs 87, 93 (HOMO), 94 (LUMO), and 95 from DFT calculations of  $\text{P}(\text{NMePh})_3$ . Hydrogen atoms are not shown. Despite their similar appearance, MO 93 has significantly less calculated P 3p character than MO 87 (4.6% vs. 18.4%). MO 93 also has less P 3s character than MO 87 (4.4% vs. 10.7%).

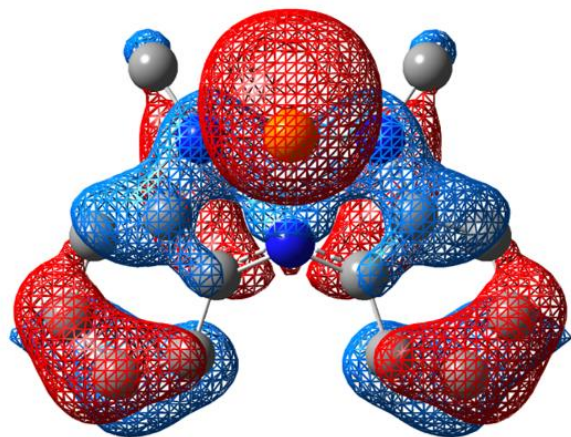

MO 63

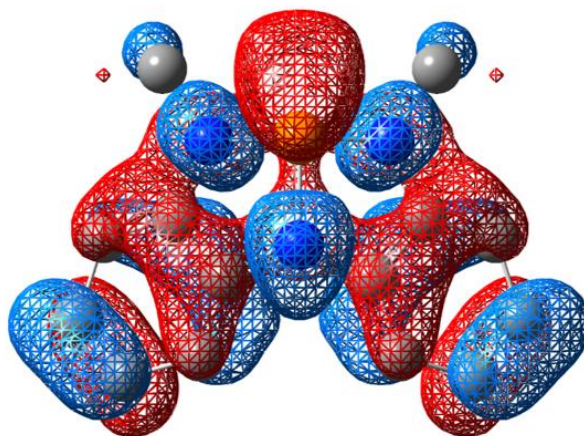

MO 67

**Figure S7.** Kohn-Sham orbitals for MO 63 and MO 67 (HOMO) from DFT calculations of **1**. Hydrogen atoms are not shown.



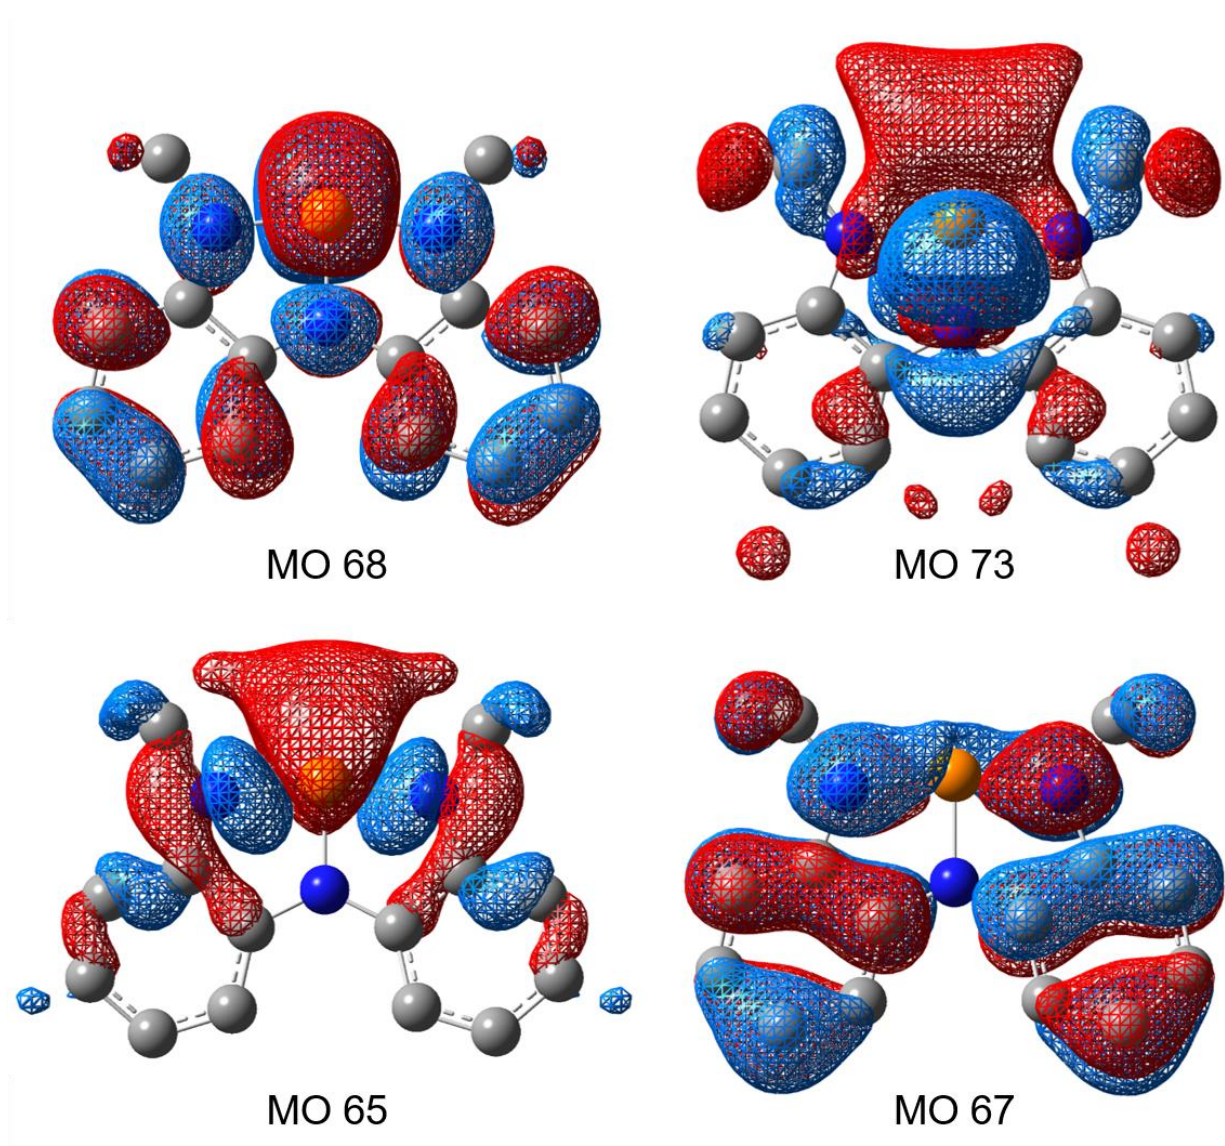

**Figure S8.** Kohn-Sham orbitals for MOs 65, 67 (HOMO), 68 (LUMO), and 73 from DFT calculations of  $C_{2v}$ -**1**. Hydrogen atoms are not shown.



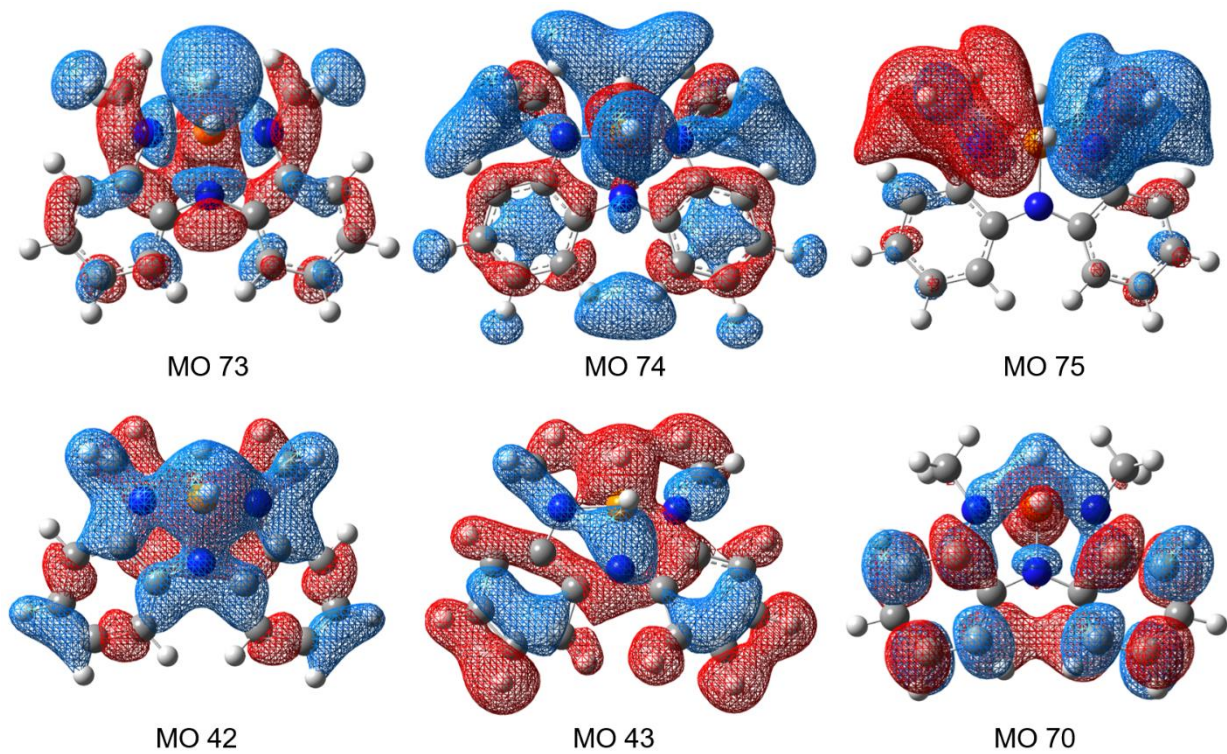

**Figure S9.** Kohn-Sham orbitals for MOs 42, 43, 70, 73, 74, and 75 from DFT calculations of  $\mathbf{1}\cdot[\text{H}]_2$ .

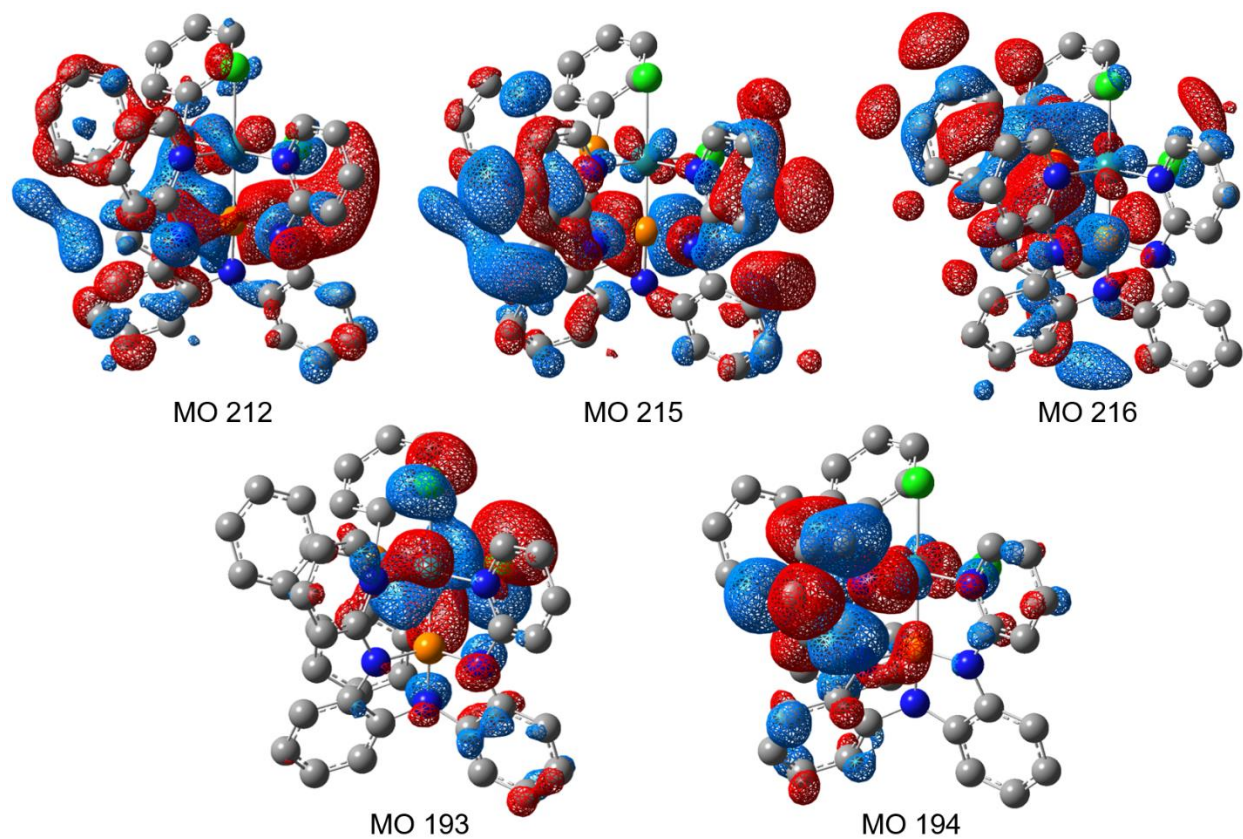

**Figure S10.** Kohn-Sham orbitals for MOs 193 (HOMO), 194 (LUMO), 212, 215, and 216 from DFT calculations of  $2\cdot[\text{Ru}]$ . Hydrogen atoms are not shown.

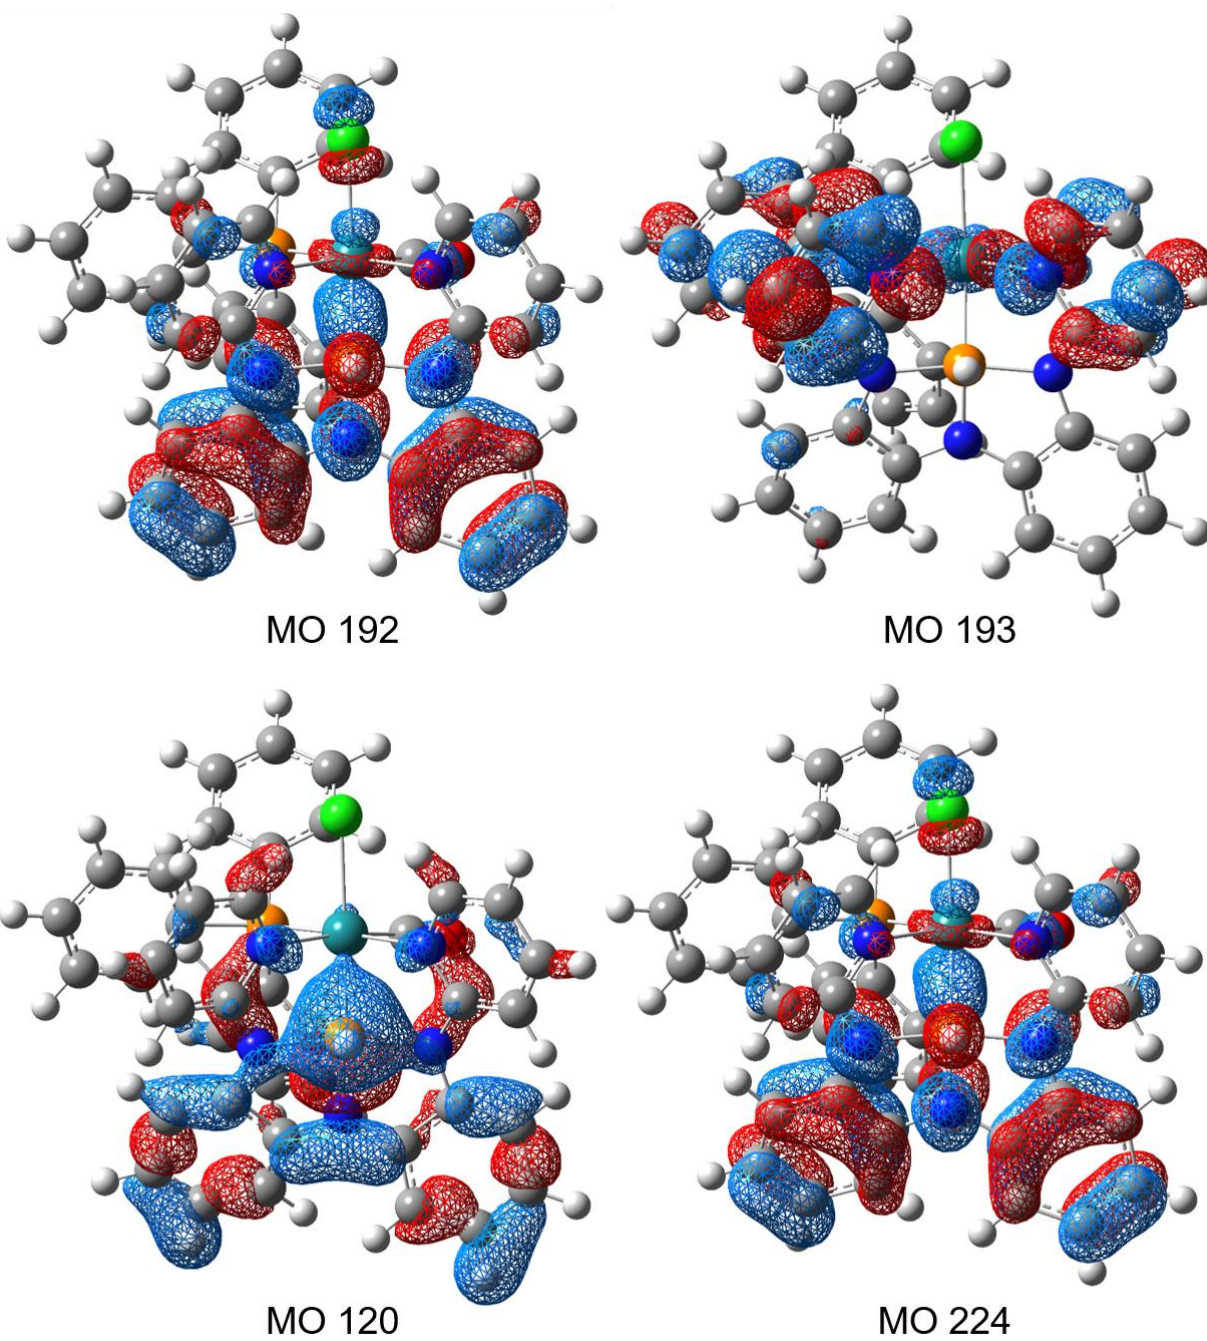

**Figure S11.** Kohn-Sham orbitals for MOs 120, 192 (HOMO), 193 (LUMO), 224 from DFT calculations of  $2\cdot[\text{H}][\text{Ru}]$ .



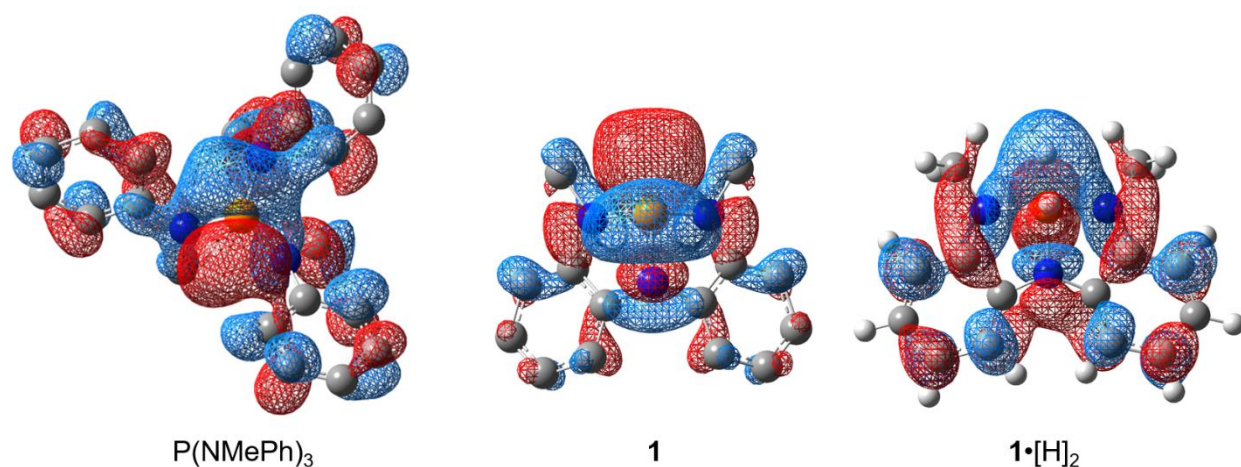

**Figure S12.** Plot of first natural transition orbitals calculated for  $P(NMePh)_3$ , **1**, and **1•[H]<sub>2</sub>**. Hydrogen atoms are not shown on  $P(NMePh)_3$  and **1**.

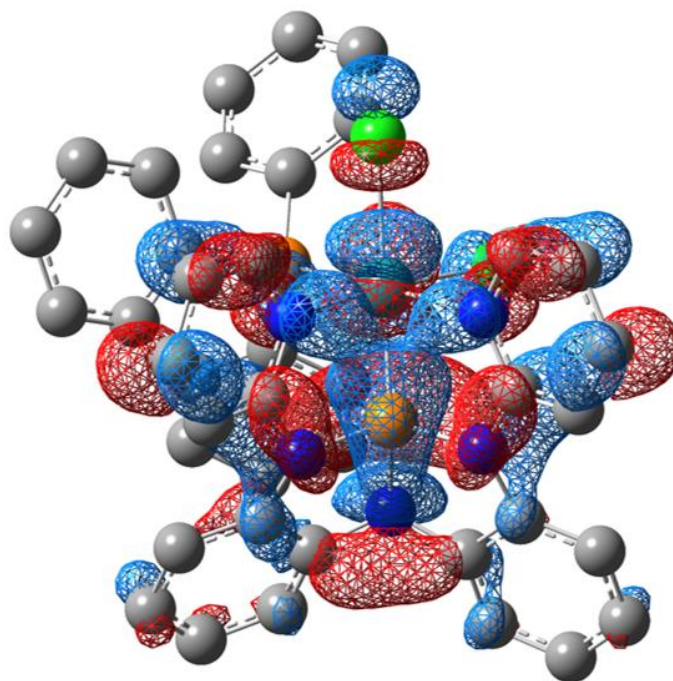

**Figure S13.** Plot of 14<sup>th</sup> natural transition orbital corresponding to the intense transition at 2146.8 eV in the P K-edge XAS spectrum of **2•[Ru]** (Figure 3b). Hydrogen atoms are not shown. Calculated composition (most relevant atoms and orbitals): Ru 4d = 16.3%, P 3p (**2**) = 32.8%, P 3p (PPh<sub>3</sub>) = 0.6%, N 2p = 3.5%.

The calculation of the energies of  $\text{P}(\text{NH}_2)_3$  within  $C_s$  symmetry was performed at the B3LYP/6-31G\* level of theory. By parameterizing  $\text{P}(\text{NH}_2)_3$  as depicted in Figure 5, 4141 discrete input structures in the range  $80^\circ \leq \theta \leq 120^\circ$  and  $80^\circ \leq \varphi \leq 180^\circ$  at  $1^\circ$  increments were generated and submitted to optimization within the geometry constraints. The 2D contour maps depicting the energies (Figure 5 and Figure S14) were plotted in Origin 2019 with smoothing to improve clarity. Within the parameterization, the dihedral angles  $\angle\text{HNPH}$  are not restrained and are free to optimization at each input structure. Consequently, small conformational changes associated with bond rotation about the P–N bonds contributes a small underlying ‘waviness’ to the energy plots. This effect is most pronounced in the plot of HOMO (Figure S14b), which shows a line of discontinuity at  $\theta=101^\circ$  arising from a change in preferred conformation in the optimized geometry (Figure S15).

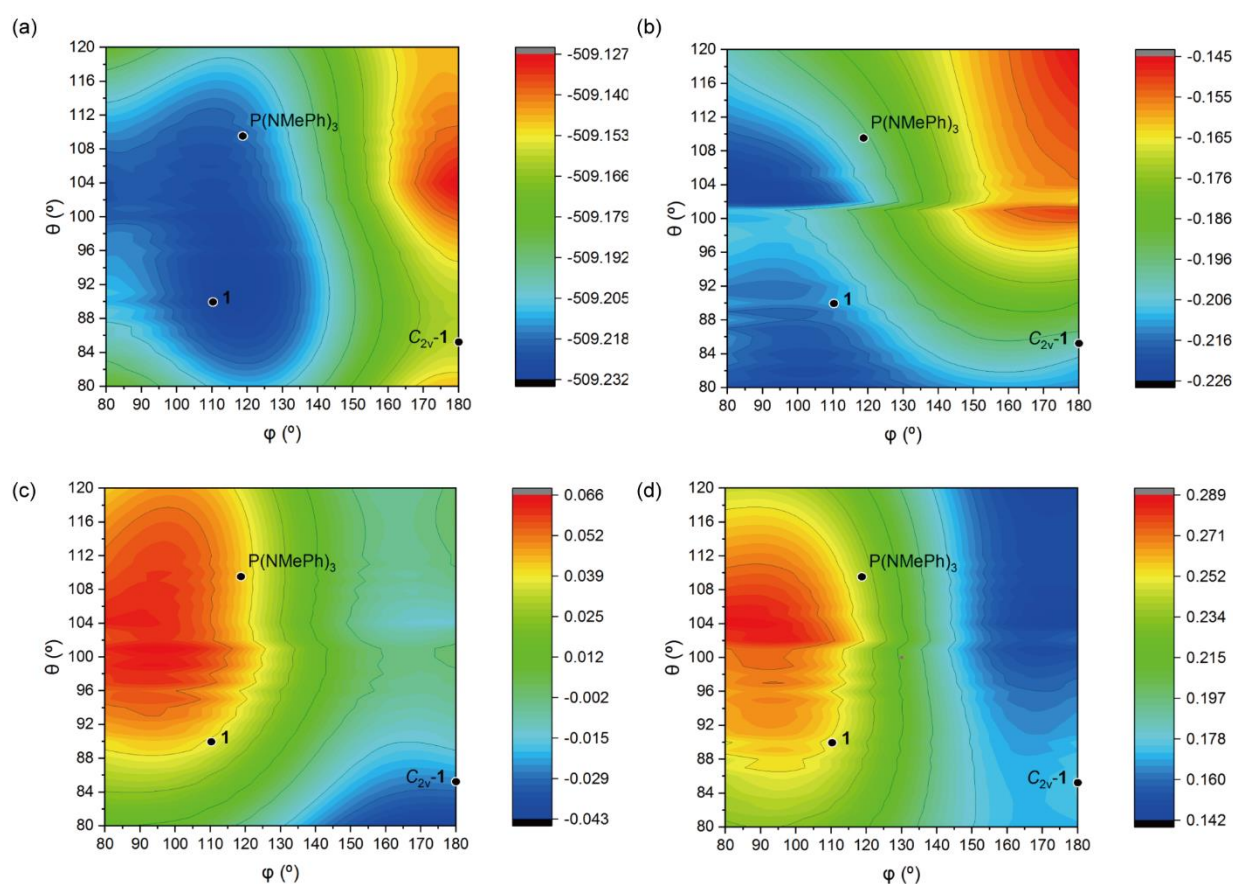

**Figure S14.** Contour maps depicting the orbital of (a) Total electronic energy, (b) HOMO energies, (c) LUMO energies, (d)  $\Delta\text{HOMO-LUMO}$  for all  $\text{P}(\text{NH}_2)_3$  structures with  $C_s$ -symmetry. Energies are shown in a units of Hartrees. Points corresponding to the structures of  $\text{P}(\text{NMePh})_3$ , **1** and  $C_{2v}\text{-1}$  are superimposed as black points.

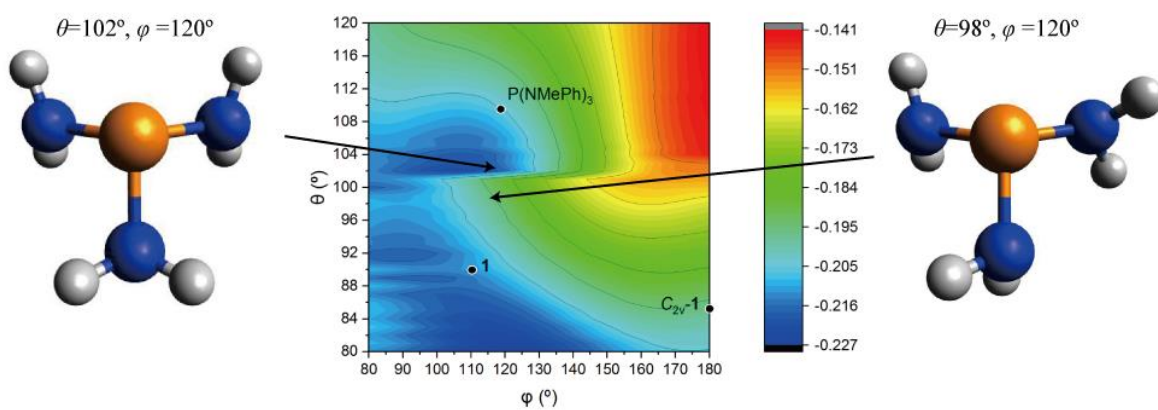

**Figure S15.** Difference in the conformation of  $\text{P}(\text{NH}_2)_3$ , between  $\theta = 102^\circ$ ,  $\varphi = 120^\circ$  and  $\theta = 98^\circ$ ,  $\varphi = 120^\circ$ .

**Table S17.** DFT calculated bond distances (Å) and angles (deg) for P(NMePh)<sub>3</sub>, **1**, and C<sub>2v</sub>-**1**.

|                                  | P(NMePh) <sub>3</sub> | <b>1</b> | C <sub>2v</sub> - <b>1</b> |
|----------------------------------|-----------------------|----------|----------------------------|
| N <sub>a</sub> -P (Å)            | 1.75463               | 1.75079  | 1.85316                    |
| N <sub>b</sub> -P (Å)            | 1.75867               | 1.75085  | 1.85316                    |
| N <sub>c</sub> -P (Å)            | 1.74529               | 1.78508  | 1.79691                    |
| N <sub>a</sub> -P-N <sub>c</sub> | 101.1644              | 89.0050  | 83.1372                    |
| N <sub>c</sub> -P-N <sub>b</sub> | 100.7412              | 89.0041  | 83.1372                    |
| N <sub>a</sub> -P-N <sub>b</sub> | 99.7450               | 118.3600 | 166.2743                   |

**Table S18.** Calculated bond distances (Å) and angles (deg) for **1**•[H<sub>2</sub>], **2**•[Ru], and **2**•[H][Ru].

|                                  | <b>1</b> •[H <sub>2</sub> ] | <b>2</b> •[Ru] | <b>2</b> •[H][Ru] |
|----------------------------------|-----------------------------|----------------|-------------------|
| N <sub>a</sub> -P (Å)            | 1.73743                     | 1.76363        | 1.86703           |
| N <sub>b</sub> -P (Å)            | 1.73927                     | 1.7434         | 1.87203           |
| N <sub>c</sub> -P (Å)            | 1.81174                     | 1.73199        | 1.74552           |
| H <sub>a</sub> -P (Å)            | 1.43546                     | -              | 1.41729           |
| H <sub>b</sub> -P (Å)            | 1.42045                     | -              | -                 |
| Ru-P <sub>a</sub> (Å)            | -                           | 2.14518        | 2.28148           |
| Ru-P <sub>b</sub> (Å)            | -                           | 2.35122        | 2.37341           |
| Ru-N <sub>d</sub> (Å)            | -                           | 2.17847        | 2.27735           |
| Ru-N <sub>e</sub> (Å)            | -                           | 2.21536        | 2.23774           |
| Ru-Cl <sub>a</sub> (Å)           | -                           | 2.50583        | 2.50792           |
| Ru-Cl <sub>b</sub> (Å)           | -                           | 2.44612        | -                 |
| Ru-CO (Å)                        | -                           | -              | 1.85471           |
| N <sub>a</sub> -P-N <sub>c</sub> | 86.4440                     | 90.3278        | 86.0845           |
| N <sub>c</sub> -P-N <sub>b</sub> | 86.4344                     | 91.1381        | 86.5703           |
| N <sub>c</sub> -P-H <sub>b</sub> | 97.9698                     | -              | -                 |
| N <sub>c</sub> -P-H <sub>a</sub> | 165.0996                    | -              | 110.9246          |
| N <sub>a</sub> -P-N <sub>b</sub> | 145.3872                    | 114.2708       | 169.3796          |
| N <sub>a</sub> -P-H <sub>b</sub> | 107.4010                    | -              | -                 |
| N <sub>a</sub> -P-H <sub>a</sub> | 89.2169                     | -              | 87.6441           |
| N <sub>b</sub> -P-H <sub>b</sub> | 107.1213                    | -              | -                 |
| N <sub>b</sub> -P-H <sub>a</sub> | 89.0884                     | -              | 87.9057           |
| H <sub>a</sub> -P-H <sub>b</sub> | 96.9302                     | -              | -                 |
| Ru-P-N <sub>a</sub>              | -                           | 104.5351       | 96.1406           |

|                                     |   |          |          |
|-------------------------------------|---|----------|----------|
| Ru-P-N <sub>b</sub>                 | - | 106.2463 | 141.1131 |
| Ru-P-N <sub>c</sub>                 | - | 149.3345 | 94.4039  |
| Ru-P-H <sub>a</sub>                 | - | -        | 107.9580 |
| Cl <sub>a</sub> -Ru-Cl <sub>b</sub> | - | 92.8719  | -        |
| Cl <sub>b</sub> -Ru-N <sub>e</sub>  | - | 84.4527  | -        |
| Cl <sub>b</sub> -Ru-N <sub>d</sub>  | - | 174.1291 | -        |
| Cl <sub>b</sub> -Ru-P <sub>a</sub>  | - | 94.9372  | -        |
| Cl <sub>b</sub> -Ru-P <sub>b</sub>  | - | 93.1039  | -        |
| Cl <sub>a</sub> -Ru-N <sub>e</sub>  | - | 92.0802  | 92.7772  |
| Cl <sub>a</sub> -Ru-N <sub>d</sub>  | - | 90.4287  | 89.6851  |
| Cl <sub>a</sub> -Ru-P <sub>a</sub>  | - | 167.7370 | 158.1199 |
| Cl <sub>a</sub> -Ru-P <sub>b</sub>  | - | 89.8473  | 90.6778  |
| N <sub>d</sub> -Ru-N <sub>e</sub>   | - | 90.5800  | 97.2803  |
| N <sub>e</sub> -Ru-P <sub>a</sub>   | - | 79.3039  | 75.1313  |
| N <sub>e</sub> -Ru-P <sub>b</sub>   | - | 176.9588 | 172.5257 |
| N <sub>d</sub> -Ru-P <sub>a</sub>   | - | 81.0319  | 74.2068  |
| N <sub>d</sub> -Ru-P <sub>b</sub>   | - | 91.7580  | 89.3601  |
| P <sub>a</sub> -Ru-P <sub>b</sub>   | - | 99.1413  | 103.5842 |
| Cl <sub>a</sub> -Ru-CO              | - | -        | 97.8470  |
| CO-Ru-N <sub>e</sub>                | - | -        | 83.6315  |
| CO-Ru-N <sub>d</sub>                | - | -        | 172.3700 |
| CO-Ru-P <sub>a</sub>                | - | -        | 98.8113  |
| CO-Ru-P <sub>b</sub>                | - | -        | 89.3342  |

**Table S19.** Atomic coordinates and Mulliken charges from DFT calculations of P(NMePh)<sub>3</sub>, **1**, C<sub>2v</sub>-**1**, **1**•[H]<sub>2</sub>, **2**•[Ru], and **2**•[H][Ru].

| P(NMePh) <sub>3</sub> |      | Coordinates (Å) |          |          | Mulliken Charges |
|-----------------------|------|-----------------|----------|----------|------------------|
| Atom #                | Atom | x               | y        | z        |                  |
| 1                     | P    | 0.032281        | -0.25009 | -0.06582 | 0.8409232        |
| 2                     | N    | -1.32768        | -0.7966  | 0.881739 | -0.6510361       |
| 3                     | N    | 1.322871        | -1.25562 | 0.579318 | -0.6434773       |
| 4                     | N    | 0.404592        | 1.263792 | 0.739333 | -0.6484934       |
| 5                     | C    | -1.62271        | -0.19594 | 2.185139 | -0.1640698       |
| 6                     | H    | -0.70886        | -0.12012 | 2.776816 | 0.1098363        |
| 7                     | H    | -2.05175        | 0.810868 | 2.100562 | 0.121858         |
| 8                     | H    | -2.32246        | -0.83781 | 2.72805  | 0.1179726        |



|    |   |          |          |          |            |
|----|---|----------|----------|----------|------------|
| 9  | C | 1.40246  | 1.403935 | 1.797532 | -0.1631009 |
| 10 | H | 1.055555 | 2.127906 | 2.543033 | 0.113534   |
| 11 | H | 1.556463 | 0.44354  | 2.288189 | 0.1192496  |
| 12 | H | 2.376753 | 1.730275 | 1.411193 | 0.1180646  |
| 13 | C | 1.101203 | -2.30497 | 1.568819 | -0.1755166 |
| 14 | H | 1.783287 | -2.19221 | 2.422123 | 0.1077186  |
| 15 | H | 0.074182 | -2.25553 | 1.923641 | 0.1338906  |
| 16 | H | 1.25332  | -3.30287 | 1.138021 | 0.1149788  |
| 17 | C | -2.37965 | -1.43284 | 0.179097 | 0.2753412  |
| 18 | C | -2.0779  | -2.41643 | -0.78059 | -0.1182996 |
| 19 | C | -3.72777 | -1.10596 | 0.407689 | -0.1162406 |
| 20 | C | -3.09467 | -3.03448 | -1.50478 | -0.0979325 |
| 21 | H | -1.04362 | -2.70517 | -0.94226 | 0.1009264  |
| 22 | C | -4.73958 | -1.7499  | -0.30537 | -0.0988036 |
| 23 | H | -3.98801 | -0.33985 | 1.129898 | 0.0844582  |
| 24 | C | -4.43304 | -2.71151 | -1.269   | -0.0852757 |
| 25 | H | -2.83774 | -3.78866 | -2.24327 | 0.0870788  |
| 26 | H | -5.77526 | -1.48433 | -0.11168 | 0.0843899  |
| 27 | H | -5.22432 | -3.20532 | -1.82452 | 0.0813306  |
| 28 | C | -0.15698 | 2.436202 | 0.192709 | 0.2836575  |
| 29 | C | 0.50297  | 3.677089 | 0.277627 | -0.1164173 |
| 30 | C | -1.41313 | 2.390729 | -0.44796 | -0.1340484 |
| 31 | C | -0.06985 | 4.823032 | -0.2728  | -0.0985046 |
| 32 | H | 1.470027 | 3.748167 | 0.76206  | 0.0812623  |
| 33 | C | -1.96284 | 3.539293 | -1.01334 | -0.1009077 |
| 34 | H | -1.971   | 1.460436 | -0.48829 | 0.1050391  |
| 35 | C | -1.30029 | 4.765316 | -0.92892 | -0.0870764 |
| 36 | H | 0.460489 | 5.768264 | -0.19361 | 0.0818987  |
| 37 | H | -2.92936 | 3.474274 | -1.5054  | 0.0852256  |
| 38 | H | -1.73874 | 5.66049  | -1.35897 | 0.0784234  |
| 39 | C | 2.592102 | -1.17381 | -0.02785 | 0.2987649  |
| 40 | C | 3.581029 | -2.15297 | 0.199023 | -0.1256714 |
| 41 | C | 2.923658 | -0.09142 | -0.87422 | -0.1448631 |
| 42 | C | 4.831514 | -2.05978 | -0.41211 | -0.0982274 |
| 43 | H | 3.384305 | -2.99518 | 0.850198 | 0.0777583  |
| 44 | C | 4.171563 | -0.02009 | -1.48707 | -0.1015111 |
| 45 | H | 2.211885 | 0.707991 | -1.04764 | 0.1124315  |
| 46 | C | 5.140077 | -1.00066 | -1.26449 | -0.0883223 |
| 47 | H | 5.569645 | -2.83265 | -0.21467 | 0.0803675  |
| 48 | H | 4.388755 | 0.823818 | -2.13616 | 0.0843302  |
| 49 | H | 6.114821 | -0.93496 | -1.73753 | 0.0770851  |

| <b>1</b>      |             | <b>Coordinates (Å)</b> |          |          | <b>Mulliken</b> |
|---------------|-------------|------------------------|----------|----------|-----------------|
| <b>Atom #</b> | <b>Atom</b> | <b>x</b>               | <b>y</b> | <b>z</b> | <b>Charges</b>  |

|    |   |          |          |          |          |
|----|---|----------|----------|----------|----------|
| 1  | C | -2.04681 | 0.232158 | -0.17352 | 0.30956  |
| 2  | C | -1.2317  | -0.75609 | 0.419152 | 0.21685  |
| 3  | C | 1.231603 | -0.75618 | 0.419121 | 0.216884 |
| 4  | C | 2.046843 | 0.23202  | -0.17345 | 0.309535 |
| 5  | P | 5.53E-05 | 1.56155  | 0.858179 | 0.701031 |
| 6  | N | -6.5E-06 | -0.22304 | 0.900206 | -0.68238 |
| 7  | N | -1.50349 | 1.510072 | -0.03747 | -0.6059  |
| 8  | N | 1.503651 | 1.51     | -0.03725 | -0.60588 |
| 9  | C | -2.28652 | 2.704384 | -0.29221 | -0.16631 |
| 10 | H | -3.28066 | 2.629515 | 0.16612  | 0.119304 |
| 11 | H | -1.76983 | 3.56628  | 0.142223 | 0.114566 |
| 12 | H | -2.41345 | 2.891367 | -1.3661  | 0.119407 |
| 13 | C | 2.286861 | 2.704234 | -0.29188 | -0.16631 |
| 14 | H | 1.770213 | 3.56619  | 0.142477 | 0.114572 |
| 15 | H | 3.280935 | 2.629229 | 0.166564 | 0.119311 |
| 16 | H | 2.413935 | 2.891194 | -1.36576 | 0.11941  |
| 17 | C | 1.661016 | -2.07618 | 0.471944 | -0.10931 |
| 18 | C | 3.269731 | -0.10997 | -0.74888 | -0.13383 |
| 19 | C | -1.66123 | -2.07605 | 0.472096 | -0.10931 |
| 20 | C | -3.26973 | -0.10979 | -0.74892 | -0.13384 |
| 21 | H | 1.059742 | -2.83301 | 0.960265 | 0.086235 |
| 22 | H | 3.889626 | 0.646427 | -1.21896 | 0.081466 |
| 23 | H | -1.06    | -2.83287 | 0.960479 | 0.086238 |
| 24 | H | -3.88956 | 0.646602 | -1.21909 | 0.081464 |
| 25 | C | 2.893592 | -2.41944 | -0.1031  | -0.10665 |
| 26 | C | 3.686743 | -1.44687 | -0.70706 | -0.09461 |
| 27 | C | -2.89387 | -2.41924 | -0.10289 | -0.10666 |
| 28 | C | -3.68691 | -1.44664 | -0.70691 | -0.0946  |
| 29 | H | -4.64307 | -1.71945 | -1.14374 | 0.079913 |
| 30 | H | -3.22932 | -3.451   | -0.06615 | 0.079968 |
| 31 | H | 3.228919 | -3.45125 | -0.06648 | 0.079969 |
| 32 | H | 4.64286  | -1.71976 | -1.14392 | 0.079915 |

| <b>C<sub>2v</sub>-1</b> |             | <b>Coordinates (Å)</b> |          |          | <b>Mulliken</b> |
|-------------------------|-------------|------------------------|----------|----------|-----------------|
| <b>Atom #</b>           | <b>Atom</b> | <b>x</b>               | <b>y</b> | <b>z</b> | <b>Charges</b>  |
| 1                       | C           | -2.30954               | 0.233616 | 0.084769 | 0.28514         |
| 2                       | C           | -1.24842               | -0.70403 | -0.0405  | 0.27446         |
| 3                       | C           | 1.248418               | -0.70403 | 0.040535 | 0.274459        |
| 4                       | C           | 2.30954                | 0.23362  | -0.08478 | 0.28514         |
| 5                       | P           | -1.8E-06               | 1.723467 | 2.73E-05 | 0.579799        |
| 6                       | N           | -2E-07                 | -0.07345 | 2.57E-05 | -0.70537        |
| 7                       | N           | -1.83385               | 1.502026 | 0.148828 | -0.59457        |
| 8                       | N           | 1.833848               | 1.50203  | -0.14882 | -0.59457        |
| 9                       | C           | -2.69572               | 2.660314 | 0.22501  | -0.17086        |

|    |   |          |          |          |          |
|----|---|----------|----------|----------|----------|
| 10 | H | -3.27694 | 2.673981 | 1.155924 | 0.115631 |
| 11 | H | -2.06553 | 3.555938 | 0.201044 | 0.118885 |
| 12 | H | -3.39573 | 2.706212 | -0.61935 | 0.113793 |
| 13 | C | 2.695709 | 2.660319 | -0.22503 | -0.17086 |
| 14 | H | 2.06552  | 3.555943 | -0.20101 | 0.118884 |
| 15 | H | 3.395765 | 2.706202 | 0.619289 | 0.113792 |
| 16 | H | 3.276875 | 2.674002 | -1.15598 | 0.115631 |
| 17 | C | 1.555412 | -2.05596 | 0.264543 | -0.10679 |
| 18 | C | 3.650259 | -0.19799 | -0.08646 | -0.11701 |
| 19 | C | -1.5554  | -2.05597 | -0.2645  | -0.10679 |
| 20 | C | -3.65026 | -0.198   | 0.086396 | -0.11701 |
| 21 | H | 0.784839 | -2.77994 | 0.480465 | 0.096627 |
| 22 | H | 4.45051  | 0.525413 | -0.20162 | 0.085228 |
| 23 | H | -0.78482 | -2.77995 | -0.48039 | 0.096625 |
| 24 | H | -4.45052 | 0.52541  | 0.201524 | 0.085228 |
| 25 | C | 2.885319 | -2.46619 | 0.275098 | -0.10844 |
| 26 | C | 3.927653 | -1.54682 | 0.080001 | -0.09596 |
| 27 | C | -2.88531 | -2.4662  | -0.2751  | -0.10844 |
| 28 | C | -3.92765 | -1.54682 | -0.08005 | -0.09596 |
| 29 | H | -4.95825 | -1.88958 | -0.08278 | 0.083836 |
| 30 | H | -3.11297 | -3.51276 | -0.45198 | 0.082818 |
| 31 | H | 3.112989 | -3.51275 | 0.451989 | 0.082818 |
| 32 | H | 4.958254 | -1.88957 | 0.0827   | 0.083836 |

| <b>1•[H]<sub>2</sub></b> |             | <b>Coordinates (Å)</b> |          |          | <b>Mulliken</b> |
|--------------------------|-------------|------------------------|----------|----------|-----------------|
| <b>Atom #</b>            | <b>Atom</b> | <b>x</b>               | <b>y</b> | <b>z</b> | <b>Charges</b>  |
| 1                        | C           | 2.230491               | 0.195315 | 0.019991 | 0.273275        |
| 2                        | C           | 1.257696               | -0.81886 | -0.15878 | 0.286462        |
| 3                        | C           | -1.26874               | -0.80583 | -0.18327 | 0.283423        |
| 4                        | C           | -2.21968               | 0.214131 | 0.068326 | 0.274004        |
| 5                        | P           | 0.001798               | 1.55217  | -0.50003 | 0.916195        |
| 6                        | N           | -0.00032               | -0.25477 | -0.36827 | -0.75767        |
| 7                        | N           | 1.674759               | 1.475899 | -0.03737 | -0.59348        |
| 8                        | N           | -1.64306               | 1.486578 | 0.061414 | -0.59472        |
| 9                        | C           | 2.492769               | 2.637995 | 0.248883 | -0.17188        |
| 10                       | H           | 3.249884               | 2.804163 | -0.52856 | 0.119759        |
| 11                       | H           | 1.860018               | 3.527514 | 0.299078 | 0.116652        |
| 12                       | H           | 3.005717               | 2.523645 | 1.211836 | 0.121541        |
| 13                       | C           | -2.44163               | 2.652001 | 0.385052 | -0.17193        |
| 14                       | H           | -1.79631               | 3.53172  | 0.446144 | 0.116772        |
| 15                       | H           | -3.21032               | 2.846298 | -0.37482 | 0.118479        |
| 16                       | H           | -2.93937               | 2.521772 | 1.353795 | 0.121805        |
| 17                       | C           | -1.68365               | -2.13644 | -0.21684 | -0.11734        |
| 18                       | C           | -3.55608               | -0.09675 | 0.299575 | -0.13448        |

|    |   |          |          |          |          |
|----|---|----------|----------|----------|----------|
| 19 | C | 1.643108 | -2.1569  | -0.083   | -0.11405 |
| 20 | C | 3.563962 | -0.12536 | 0.253839 | -0.13464 |
| 21 | H | -0.98935 | -2.93294 | -0.44524 | 0.087192 |
| 22 | H | -4.27941 | 0.68883  | 0.490262 | 0.077255 |
| 23 | H | 0.924543 | -2.95466 | -0.20647 | 0.082266 |
| 24 | H | 4.304063 | 0.65698  | 0.383412 | 0.077005 |
| 25 | C | -3.03222 | -2.44424 | 0.014288 | -0.10418 |
| 26 | C | -3.95907 | -1.43922 | 0.272837 | -0.10108 |
| 27 | C | 2.988645 | -2.47484 | 0.151444 | -0.10392 |
| 28 | C | 3.941333 | -1.47407 | 0.314533 | -0.10162 |
| 29 | H | 4.982095 | -1.7312  | 0.486344 | 0.075729 |
| 30 | H | 3.282416 | -3.51921 | 0.197914 | 0.076596 |
| 31 | H | -3.34965 | -3.48207 | -0.02065 | 0.076952 |
| 32 | H | -5.00186 | -1.68772 | 0.445256 | 0.076266 |
| 33 | H | -0.04331 | 1.646399 | -1.91663 | -0.03993 |
| 34 | H | 0.012593 | 2.962511 | -0.23288 | -0.1367  |

| <b>2•[Ru]</b> |             | <b>Coordinates (Å)</b> |          |          | <b>Mulliken</b> |
|---------------|-------------|------------------------|----------|----------|-----------------|
| <b>Atom #</b> | <b>Atom</b> | <b>x</b>               | <b>y</b> | <b>z</b> | <b>Charges</b>  |
| 1             | Ru          | -0.17981               | 1.315749 | -0.21157 | -0.20497        |
| 2             | Cl          | 0.269319               | 1.683505 | -2.58782 | -0.34561        |
| 3             | Cl          | -1.89276               | 3.142558 | -0.12337 | -0.44788        |
| 4             | N           | 1.48104                | 2.747568 | 0.10349  | -0.49425        |
| 5             | C           | 1.255862               | 4.062672 | 0.268121 | 0.133123        |
| 6             | C           | 2.76373                | 2.296424 | 0.089216 | 0.507629        |
| 7             | C           | 2.281091               | 4.985333 | 0.439475 | -0.11573        |
| 8             | H           | 0.20924                | 4.349362 | 0.247008 | 0.169534        |
| 9             | C           | 3.841957               | 3.160166 | 0.318836 | -0.12225        |
| 10            | C           | 3.593856               | 4.518517 | 0.48178  | -0.06245        |
| 11            | H           | 2.04474                | 6.037158 | 0.552211 | 0.108404        |
| 12            | H           | 4.843362               | 2.764021 | 0.409082 | 0.111517        |
| 13            | H           | 4.421706               | 5.19968  | 0.654534 | 0.107765        |
| 14            | N           | -0.36152               | 1.019183 | 1.938951 | -0.48989        |
| 15            | C           | -1.17248               | 1.768117 | 2.714003 | 0.123524        |
| 16            | C           | 0.396173               | 0.059083 | 2.543743 | 0.469995        |
| 17            | C           | -1.26643               | 1.602916 | 4.089772 | -0.10173        |
| 18            | H           | -1.75966               | 2.502524 | 2.173671 | 0.165907        |
| 19            | C           | 0.399585               | -0.1147  | 3.93153  | -0.11706        |
| 20            | C           | -0.4547                | 0.655561 | 4.711529 | -0.06806        |
| 21            | H           | -1.95756               | 2.2191   | 4.653088 | 0.107263        |
| 22            | H           | 1.083826               | -0.82541 | 4.376498 | 0.11451         |
| 23            | H           | -0.473                 | 0.524713 | 5.789159 | 0.106631        |
| 24            | P           | 1.460811               | -0.03533 | 0.079473 | 1.041831        |
| 25            | P           | -1.88033               | -0.2493  | -0.64415 | 0.669877        |

|    |   |          |          |          |          |
|----|---|----------|----------|----------|----------|
| 26 | N | 2.911934 | 0.916515 | -0.08691 | -0.69825 |
| 27 | N | 1.208647 | -0.6963  | 1.695001 | -0.6835  |
| 28 | N | 2.308372 | -1.47199 | -0.38684 | -0.69728 |
| 29 | C | 3.957959 | 0.19318  | -0.70898 | 0.30731  |
| 30 | C | 5.171818 | 0.658259 | -1.21104 | -0.12008 |
| 31 | C | 3.612295 | -1.17063 | -0.86456 | 0.220468 |
| 32 | C | 6.054601 | -0.24789 | -1.81116 | -0.09567 |
| 33 | H | 5.428806 | 1.707355 | -1.17149 | 0.097464 |
| 34 | C | 4.492037 | -2.06274 | -1.46315 | -0.1053  |
| 35 | C | 5.730164 | -1.59765 | -1.92068 | -0.10122 |
| 36 | H | 6.998335 | 0.118741 | -2.20258 | 0.090137 |
| 37 | H | 4.215332 | -3.10233 | -1.58435 | 0.088408 |
| 38 | H | 6.42381  | -2.29122 | -2.38501 | 0.089437 |
| 39 | C | 1.404232 | -2.09755 | 1.705518 | 0.288962 |
| 40 | C | 0.996718 | -3.02703 | 2.660423 | -0.13852 |
| 41 | C | 2.01132  | -2.53932 | 0.504636 | 0.222119 |
| 42 | C | 1.215633 | -4.38974 | 2.417353 | -0.09255 |
| 43 | H | 0.494109 | -2.71144 | 3.565389 | 0.092672 |
| 44 | C | 2.198937 | -3.89213 | 0.261758 | -0.09873 |
| 45 | C | 1.815361 | -4.82104 | 1.236945 | -0.10324 |
| 46 | H | 0.895018 | -5.11414 | 3.159746 | 0.089611 |
| 47 | H | 2.597649 | -4.22181 | -0.68884 | 0.102087 |
| 48 | H | 1.963231 | -5.88046 | 1.054702 | 0.089601 |
| 49 | C | -3.20509 | 0.129074 | -1.86642 | -0.13534 |
| 50 | C | -3.16798 | 1.282566 | -2.65798 | -0.06003 |
| 51 | C | -4.26219 | -0.78476 | -2.01899 | -0.07752 |
| 52 | C | -4.18458 | 1.515974 | -3.58855 | -0.0913  |
| 53 | H | -2.35487 | 1.987273 | -2.54928 | 0.171093 |
| 54 | C | -5.27382 | -0.54351 | -2.94477 | -0.09209 |
| 55 | H | -4.29488 | -1.68572 | -1.41318 | 0.087974 |
| 56 | C | -5.23548 | 0.611156 | -3.7327  | -0.08269 |
| 57 | H | -4.14864 | 2.413591 | -4.19886 | 0.093391 |
| 58 | H | -6.0883  | -1.25434 | -3.0532  | 0.081187 |
| 59 | H | -6.02342 | 0.800363 | -4.45676 | 0.083497 |
| 60 | C | -1.28817 | -1.89654 | -1.24341 | -0.13684 |
| 61 | C | -1.82054 | -3.12373 | -0.81705 | -0.09881 |
| 62 | C | -0.28823 | -1.89504 | -2.23076 | -0.09312 |
| 63 | C | -1.33427 | -4.32443 | -1.33581 | -0.08185 |
| 64 | H | -2.61064 | -3.15061 | -0.07489 | 0.095642 |
| 65 | C | 0.185676 | -3.09781 | -2.75417 | -0.08769 |
| 66 | H | 0.113106 | -0.95167 | -2.59051 | 0.152816 |
| 67 | C | -0.32683 | -4.31504 | -2.30198 | -0.08695 |
| 68 | H | -1.74566 | -5.26635 | -0.98415 | 0.084226 |
| 69 | H | 0.962577 | -3.07812 | -3.51317 | 0.092471 |
| 70 | H | 0.050899 | -5.25117 | -2.70408 | 0.082947 |

|    |   |          |          |          |          |
|----|---|----------|----------|----------|----------|
| 71 | C | -2.82246 | -0.58404 | 0.901279 | -0.12493 |
| 72 | C | -3.94593 | 0.202739 | 1.197846 | -0.09729 |
| 73 | C | -2.33477 | -1.46661 | 1.87821  | -0.12348 |
| 74 | C | -4.57974 | 0.089179 | 2.435964 | -0.08667 |
| 75 | H | -4.31379 | 0.913412 | 0.465674 | 0.133094 |
| 76 | C | -2.97226 | -1.57922 | 3.113406 | -0.08414 |
| 77 | H | -1.45327 | -2.0669  | 1.679407 | 0.1021   |
| 78 | C | -4.09839 | -0.80322 | 3.395598 | -0.08827 |
| 79 | H | -5.44919 | 0.704052 | 2.650261 | 0.092487 |
| 80 | H | -2.58333 | -2.27018 | 3.856286 | 0.07971  |
| 81 | H | -4.59379 | -0.8901  | 4.358512 | 0.08482  |

| <b>2•[H][Ru]</b> |             | <b>Coordinates (Å)</b> |          |          | <b>Mulliken</b> |
|------------------|-------------|------------------------|----------|----------|-----------------|
| <b>Atom #</b>    | <b>Atom</b> | <b>x</b>               | <b>y</b> | <b>z</b> | <b>Charges</b>  |
| 1                | Ru          | 0.051723               | -1.4126  | 0.007698 | -0.21344        |
| 2                | Cl          | -1.49345               | -3.38757 | -0.03261 | -0.42483        |
| 3                | N           | 1.843984               | -2.66756 | -0.46171 | -0.50991        |
| 4                | C           | 1.750158               | -3.96034 | -0.82124 | 0.121134        |
| 5                | C           | 3.077431               | -2.12665 | -0.18018 | 0.46806         |
| 6                | C           | 2.854649               | -4.79259 | -0.92734 | -0.12116        |
| 7                | H           | 0.738057               | -4.31345 | -0.99029 | 0.155662        |
| 8                | C           | 4.23746                | -2.91913 | -0.29687 | -0.11671        |
| 9                | C           | 4.117407               | -4.25025 | -0.66359 | -0.06597        |
| 10               | H           | 2.725543               | -5.8316  | -1.20707 | 0.101322        |
| 11               | H           | 5.207945               | -2.46986 | -0.13794 | 0.105573        |
| 12               | H           | 5.00993                | -4.86238 | -0.7579  | 0.104246        |
| 13               | N           | -0.53179               | -0.92814 | -2.13966 | -0.50588        |
| 14               | C           | -1.15969               | -1.80351 | -2.94623 | 0.109183        |
| 15               | C           | -0.33949               | 0.360641 | -2.57392 | 0.47852         |
| 16               | C           | -1.66782               | -1.45419 | -4.18806 | -0.11919        |
| 17               | H           | -1.28515               | -2.79754 | -2.53019 | 0.148237        |
| 18               | C           | -0.84156               | 0.780002 | -3.82092 | -0.10622        |
| 19               | C           | -1.51286               | -0.13129 | -4.61914 | -0.06501        |
| 20               | H           | -2.18141               | -2.19404 | -4.79092 | 0.097119        |
| 21               | H           | -0.65541               | 1.791916 | -4.15529 | 0.104326        |
| 22               | H           | -1.89807               | 0.182206 | -5.58521 | 0.100829        |
| 23               | P           | 1.619953               | 0.064243 | -0.74379 | 0.971526        |
| 24               | P           | -1.70798               | -0.01582 | 0.77289  | 0.643841        |
| 25               | N           | 3.046692               | -0.79077 | 0.116723 | -0.71426        |
| 26               | N           | 0.443467               | 1.112477 | -1.74523 | -0.71829        |
| 27               | N           | 2.393689               | 1.565655 | -0.30342 | -0.7373         |
| 28               | C           | 4.03042                | 0.083692 | 0.553999 | 0.284077        |
| 29               | C           | 5.217726               | -0.20297 | 1.229687 | -0.12984        |
| 30               | C           | 3.668336               | 1.438475 | 0.293817 | 0.262746        |

|    |   |          |          |          |          |
|----|---|----------|----------|----------|----------|
| 31 | C | 6.090048 | 0.835799 | 1.575224 | -0.09901 |
| 32 | H | 5.450848 | -1.22396 | 1.505757 | 0.093703 |
| 33 | C | 4.56924  | 2.456314 | 0.602236 | -0.12794 |
| 34 | C | 5.779733 | 2.149192 | 1.239776 | -0.10479 |
| 35 | H | 7.011668 | 0.606091 | 2.10098  | 0.081953 |
| 36 | H | 4.361312 | 3.479503 | 0.327321 | 0.09171  |
| 37 | H | 6.469354 | 2.953442 | 1.476421 | 0.080974 |
| 38 | C | 0.615663 | 2.474344 | -1.57177 | 0.290501 |
| 39 | C | -0.17469 | 3.523536 | -2.04366 | -0.13407 |
| 40 | C | 1.700463 | 2.737657 | -0.68561 | 0.264981 |
| 41 | C | 0.086406 | 4.831474 | -1.61806 | -0.10195 |
| 42 | H | -1.01663 | 3.317194 | -2.69174 | 0.089489 |
| 43 | C | 1.906326 | 4.036143 | -0.22583 | -0.1179  |
| 44 | C | 1.106285 | 5.08257  | -0.70604 | -0.10303 |
| 45 | H | -0.53078 | 5.64511  | -1.98713 | 0.078795 |
| 46 | H | 2.649183 | 4.242418 | 0.530385 | 0.092961 |
| 47 | H | 1.285216 | 6.091327 | -0.34754 | 0.080002 |
| 48 | C | -2.94916 | -0.81627 | 1.889573 | -0.09381 |
| 49 | C | -2.55023 | -1.81726 | 2.785836 | -0.07092 |
| 50 | C | -4.28683 | -0.38878 | 1.90505  | -0.10027 |
| 51 | C | -3.463   | -2.36425 | 3.687223 | -0.0817  |
| 52 | H | -1.53712 | -2.19414 | 2.771218 | 0.115612 |
| 53 | C | -5.19897 | -0.94063 | 2.804763 | -0.0872  |
| 54 | H | -4.62737 | 0.36497  | 1.203183 | 0.09773  |
| 55 | C | -4.78846 | -1.92819 | 3.701113 | -0.08315 |
| 56 | H | -3.13668 | -3.14388 | 4.369098 | 0.09374  |
| 57 | H | -6.23089 | -0.60097 | 2.798882 | 0.085105 |
| 58 | H | -5.49898 | -2.36144 | 4.399374 | 0.087463 |
| 59 | C | -1.22043 | 1.463072 | 1.773038 | -0.10953 |
| 60 | C | -2.19896 | 2.352803 | 2.253099 | -0.08299 |
| 61 | C | 0.119093 | 1.703134 | 2.100858 | -0.08684 |
| 62 | C | -1.83792 | 3.46714  | 3.00627  | -0.08609 |
| 63 | H | -3.24722 | 2.175699 | 2.037835 | 0.097086 |
| 64 | C | 0.481013 | 2.817544 | 2.860817 | -0.07799 |
| 65 | H | 0.891422 | 1.024691 | 1.767859 | 0.111125 |
| 66 | C | -0.49392 | 3.705977 | 3.308563 | -0.08259 |
| 67 | H | -2.60667 | 4.147377 | 3.36155  | 0.089922 |
| 68 | H | 1.528492 | 2.98392  | 3.093548 | 0.097008 |
| 69 | H | -0.21382 | 4.576195 | 3.895197 | 0.090403 |
| 70 | C | -2.78453 | 0.647    | -0.56315 | -0.14908 |
| 71 | C | -3.51969 | -0.29154 | -1.30789 | -0.10266 |
| 72 | C | -2.87197 | 2.004593 | -0.89038 | -0.10908 |
| 73 | C | -4.3394  | 0.130073 | -2.35156 | -0.08134 |
| 74 | H | -3.43436 | -1.34843 | -1.06835 | 0.148715 |
| 75 | C | -3.69636 | 2.421749 | -1.93904 | -0.09112 |

|    |   |          |          |          |          |
|----|---|----------|----------|----------|----------|
| 76 | H | -2.29228 | 2.738507 | -0.34366 | 0.116705 |
| 77 | C | -4.4321  | 1.488733 | -2.66871 | -0.08672 |
| 78 | H | -4.89944 | -0.60375 | -2.92355 | 0.09208  |
| 79 | H | -3.75692 | 3.478844 | -2.18293 | 0.087631 |
| 80 | H | -5.07185 | 1.815287 | -3.48375 | 0.087165 |
| 81 | C | 0.642947 | -1.58931 | 1.756745 | 0.330942 |
| 82 | O | 1.048045 | -1.69408 | 2.839525 | -0.30326 |
| 83 | H | 2.132167 | -0.42854 | -1.96996 | -0.02688 |



## VI. Multinuclear NMR Spectra

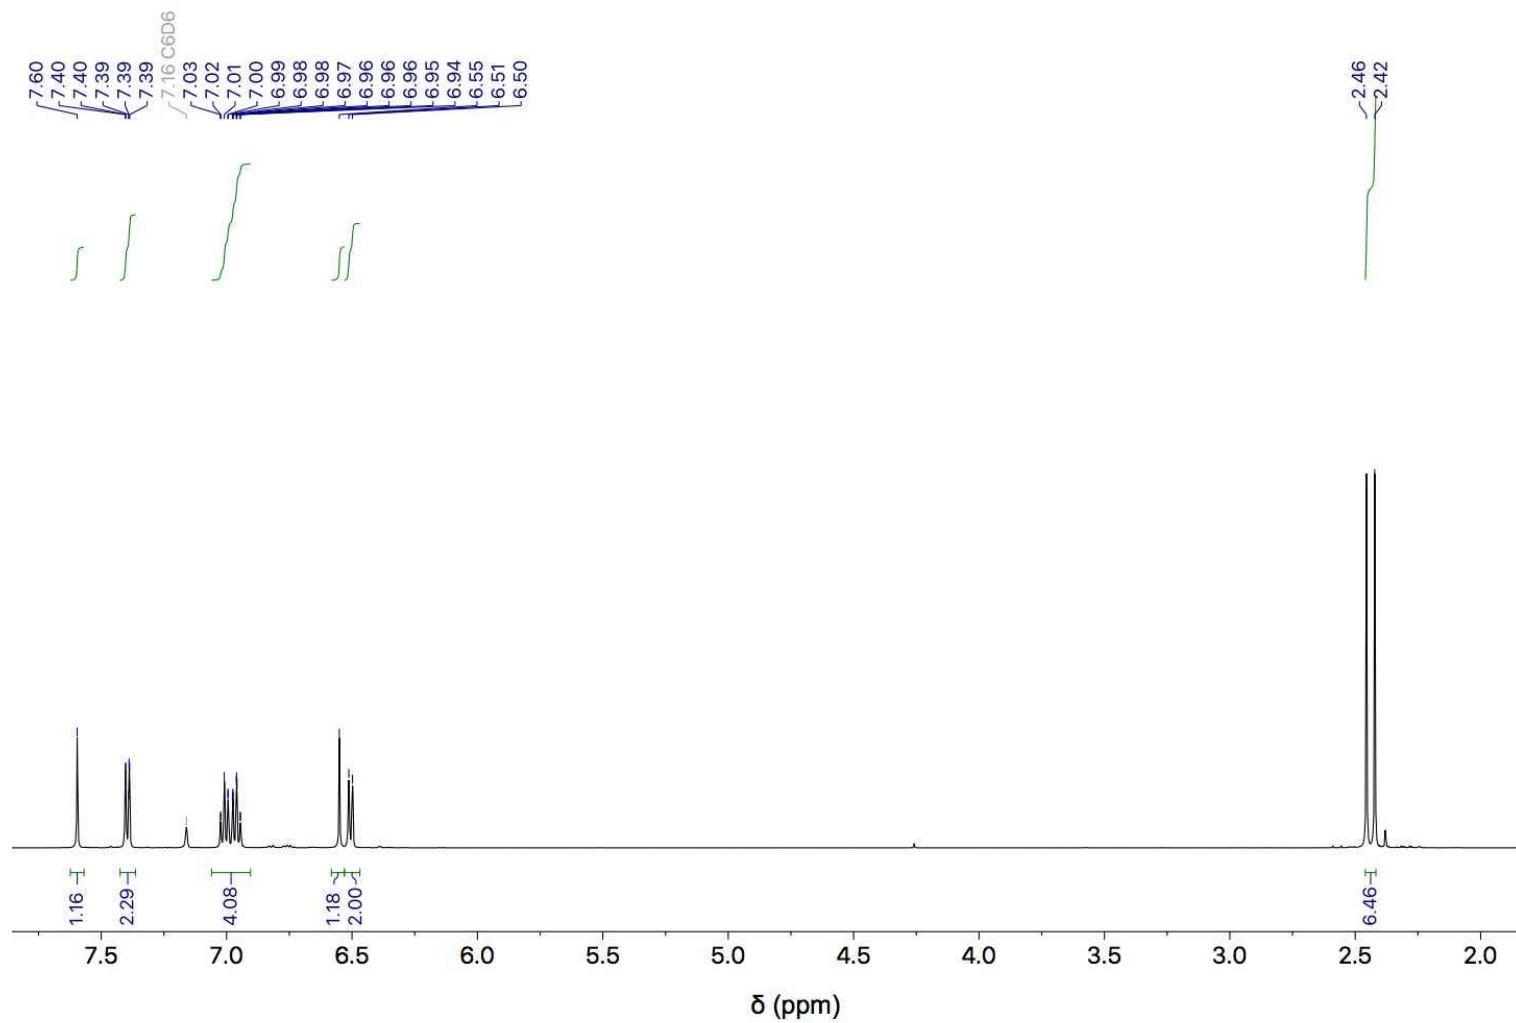

Figure S16.  $^1\text{H}$  NMR spectrum of  $1\cdot[\text{H}]_2$

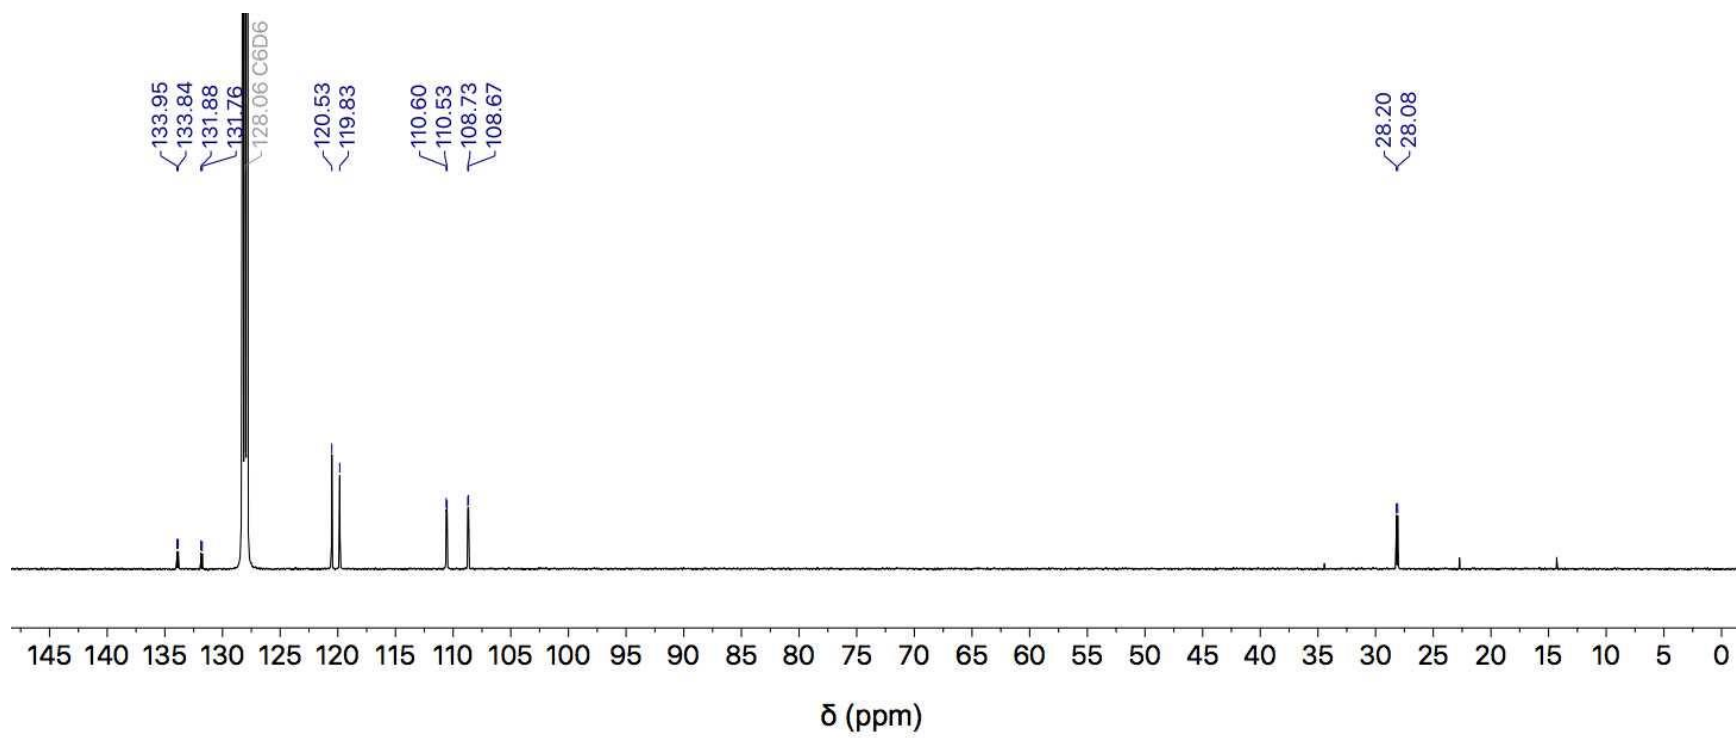

**Figure S17.**  $^{13}\text{C}$  NMR spectrum of  $1\cdot[\text{H}]_2$ .

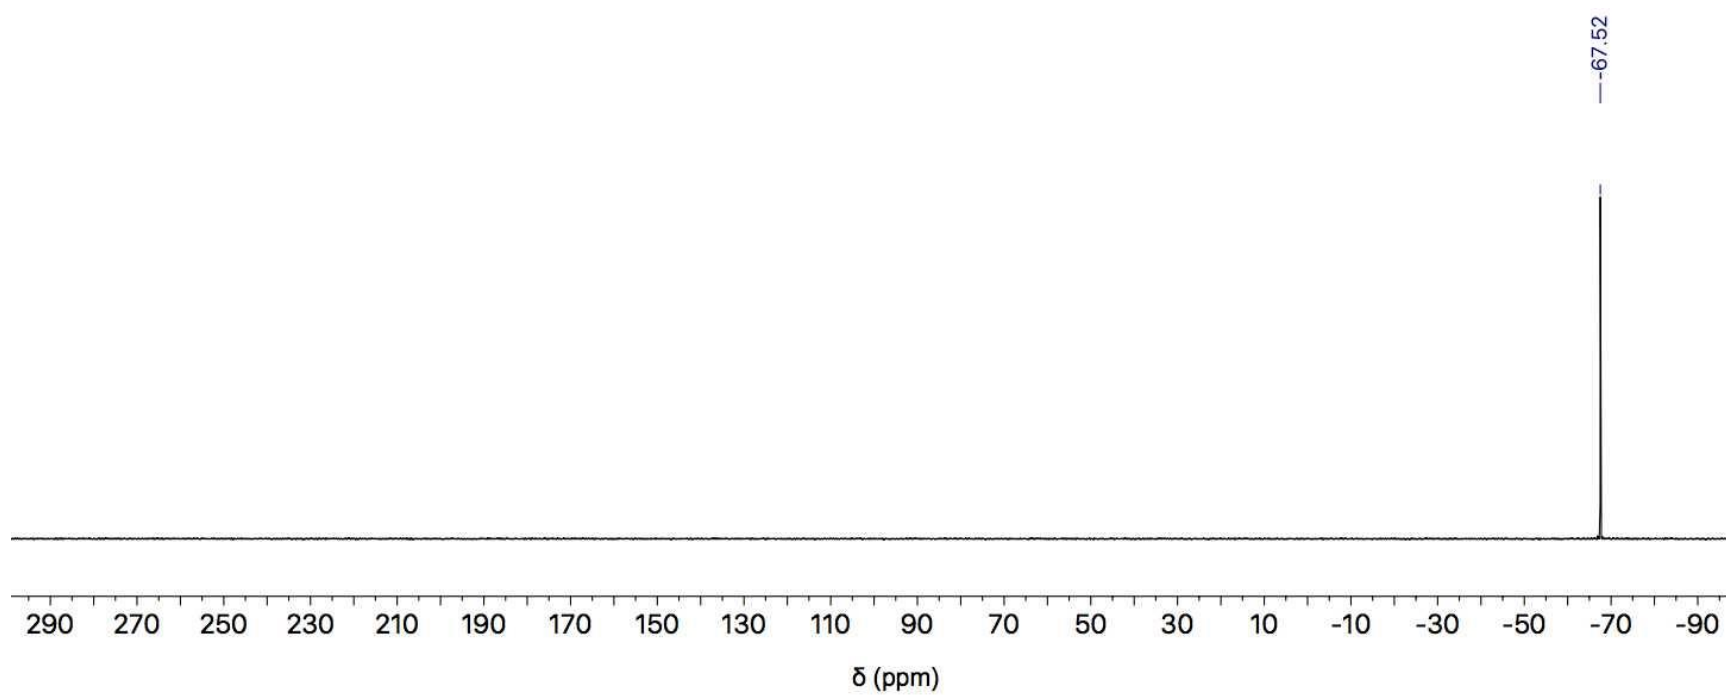

**Figure S18.**  $^{31}\text{P}\{^1\text{H}\}$  NMR spectrum of  $\mathbf{1}\cdot[\text{H}]_2$ .

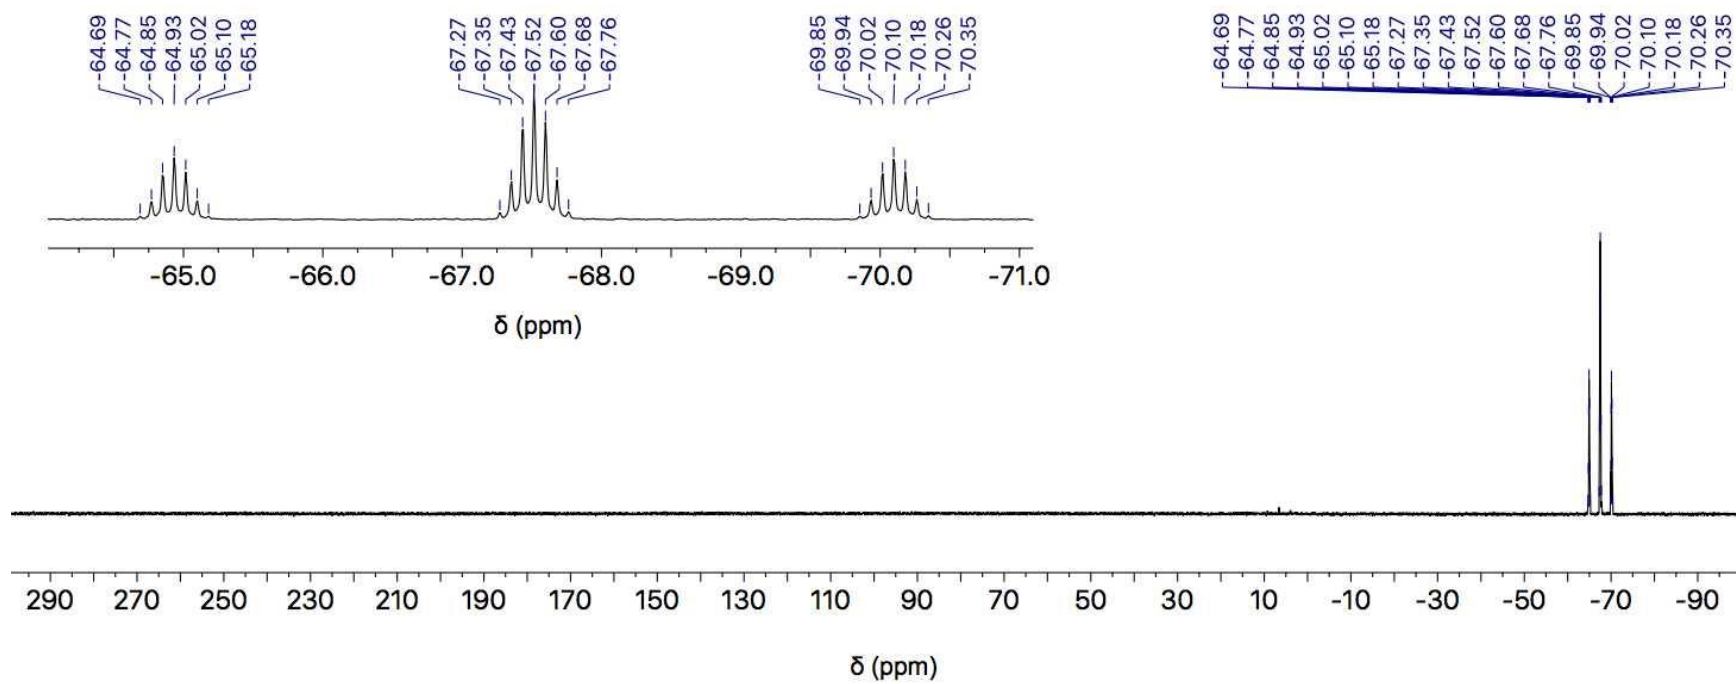

**Figure S19.**  $^{31}\text{P}$  NMR spectrum of  $\mathbf{1}\cdot[\text{H}]_2$ .

## VII. References

1. Pangborn, A. B.; Giardello, M. A.; Grubbs, R. H.; Rosen, R. K.; Timmers, F. J. Safe and Convenient Procedure for Solvent Purification. *Organometallics*, **1996**, *15*, 1518–1520.
2. Alaimo, P. J.; Peters, D. W.; Arnold, J.; Bergman, R. G. Suggested Modifications to a Distillation-Free Solvent Purification System. *J. Chem. Educ.*, **2001**, *78*, 64.
3. Bruker, *SAINTE*, 2012, Bruker AXS Inc., Madison, Wisconsin, USA.
4. Bruker, *SADABS*, 2001, Bruker AXS Inc., Madison, Wisconsin, USA.
5. Sheldrick, G. M. A Short History of SHELX. *Acta. Cryst.*, **2008**, *A64*, 112-122.
6. Rydon, H.N.; Tonge, B.L. The Organic Chemistry of Phosphorus. Part VI. Some Phosphorus-containing Derivatives of 2,2,2-Trichloroethanol and N-Methylaniline. *J. Chem. Soc.* **1957**, 4862.
7. Zhao, W.; McCarthy, S. M.; Lai, T. Y.; Yennawar, H. P.; Radosevich, A. T. Reversible Intermolecular E–H Oxidative Addition to a Geometrically Deformed and Structurally Dynamic Phosphorous Triamide. *J. Am. Chem. Soc.* **2014**, *136*, 17634–17644.
8. Tanushi, A.; Radosevich, A.T. Insertion of a Nontrigonal Phosphorus Ligand into a Transition Metal-Hydride: Direct Access to a Metallohydrophosphorane. *J. Am. Chem. Soc.* **2018**, *140*, 8114-8118.
9. Trans, D.; Addison, A. W.; Rao, T. N. Synthesis, Structure, and Spectroscopic Properties of Copper( II) Compounds Containing Nitrogen-Sulphur Donor Ligands; the Crystal and Molecular Structure of Aqua[1,7-Bis(N-Methylbenzimidazol-2'-YI)- 2,6-Dithiaheptane]Copper(II) Perchlorate. *J. Chem. Soc. Dalton. Trans.* **1984**, 1349.
10. Solomon, E. I.; Hedman, B.; Hodgson, K. O.; Dey, A.; Szilagyi, R. K. Ligand K-edge X-ray Absorption Spectroscopy: Covalency of Ligand-Metal Bonds. *Coord. Chem. Rev.* **2005**, *249*, 97-129.
11. MacMillan, S. N.; Lancaster, K. M. X-ray Spectroscopic Interrogation of Transition-Metal-Mediated Homogeneous Catalysis: Primer and Case Studies. *ACS Catal.* **2017**, *7*, 1776-1791.
12. Donahue, C. M.; Daly, S. R. Ligand K-edge XAS Studies of Metal-Phosphorus Bonds: Applications, Limitations, and Opportunities. *Comments Inorg. Chem.* **2018**, *38*, 54-78.
13. Adhikari, D.; Mossin, S.; Basuli, F.; Huffman, J. C.; Szilagyi, R. K.; Meyer, K.; Mindiola, D. J. Structural, spectroscopic, and theoretical elucidation of a redox-active pincer-type ancillary applied in catalysis. *J. Am. Chem. Soc.* **2008**, *130*, 3676-3682.
14. Harkins, S. B.; Mankad, N. P.; Miller, A. J. M.; Szilagyi, R. K.; Peters, J. C. Probing the Electronic Structures of [Cu<sub>2</sub>(μ-XR<sub>2</sub>)]<sub>n</sub><sup>+</sup> Diamond Cores as a Function of the Bridging X Atom (X = N or P) and Charge (n = 0, 1, 2). *J. Am. Chem. Soc.* **2008**, *130*, 3478-3485.
15. Mankad, N. P.; Antholine, W. E.; Szilagyi, R. K.; Peters, J. C. Three-Coordinate Copper(I) Amido and Aminyl Radical Complexes. *J. Am. Chem. Soc.* **2009**, *131*, 3878-3880.
16. Mossin, S.; Tran, B. L.; Adhikari, D.; Pink, M.; Heinemann, F. W.; Sutter, J.; Szilagyi, R. K.; Meyer, K.; Mindiola, D. J. A Mononuclear Fe(III) Single Molecule Magnet with a 3/2↔5/2 Spin Crossover. *J. Am. Chem. Soc.* **2012**, *134*, 13651-13661.
17. Donahue, C. M.; McCollum, S. P.; Forrest, C. M.; Blake, A. V.; Bellott, B. J.; Keith, J. M.; Daly, S. R. Impact of Coordination Geometry, Bite Angle, and Trans Influence on Metal–Ligand Covalency in Phenyl-Substituted Phosphine Complexes of Ni and Pd. *Inorg. Chem.* **2015**, *54*, 5646-5659.

18. Lee, K.; Wei, H.; Blake, A. V.; Donahue, C. M.; Keith, J. M.; Daly, S. R. Ligand K-edge XAS, DFT, and TDDFT Analysis of Pincer Linker Variations in Rh(I) PNP Complexes: Reactivity Insights from Electronic Structure. *Dalton Trans.* **2016**, 45, 9774-9785.
19. Blake, A. V.; Wei, H.; Lee, K.; Donahue, C. M.; Keith, J. M.; Daly, S. R. Solution and Solid Ligand K-edge XAS Studies of PdCl<sub>2</sub> Diphosphine Complexes with Phenyl and Cyclohexyl Substituents. *Eur. J. Inorg. Chem.* **2018**, 2267-2276.
20. Lee, K.; Wei, H.; Blake, A. V.; Donahue, C. M.; Keith, J. M.; Daly, S. R. Measurement of Diphosphine  $\sigma$ -Donor and  $\pi$ -Acceptor Properties in d<sup>0</sup> Titanium Complexes Using Ligand K-edge XAS and TDDFT. *Inorg. Chem.* **2018**, 57, 10277-10286.
21. Lee, K.; Wei, H.; Blake, A. V.; Donahue, C. M.; Keith, J. M.; Daly, S. R. Ligand K-edge XAS, DFT, and TDDFT Analysis of Pincer Linker Variations in Rh(I) PNP Complexes: Reactivity Insights from Electronic Structure. *Dalton Trans.* **2016**, 45, 9774-9785.
22. Blake, A. V.; Wei, H.; Lee, K.; Donahue, C. M.; Keith, J. M.; Daly, S. R. Solution and Solid Ligand K-edge XAS Studies of PdCl<sub>2</sub> Diphosphine Complexes with Phenyl and Cyclohexyl Substituents. *Eur. J. Inorg. Chem.* **2018**, 2267-2276.
23. Blake, A. V.; Wei, H.; Donahue, C. M.; Lee, K.; Keith, J. M.; Daly, S. R. Solid Energy Calibration Standards for P K-edge XANES: Electronic Structure Analysis of PPh<sub>4</sub>Br. *J. Synchrotron Radiat.* **2018**, 25, 529-536.
24. Minasian, S. G.; Keith, J. M.; Batista, E. R.; Boland, K. S.; Kozimor, S. A.; Martin, R. L.; Shuh, D. K.; Tyliszczak, T.; Vernon, L. J. Carbon K-Edge X-ray Absorption Spectroscopy and Time-Dependent Density Functional Theory Examination of Metal-Carbon Bonding in Metallocene Dichlorides. *J. Am. Chem. Soc.* **2013**, 135, 14731-14740.
25. Ravel, B.; Newville, M. ATHENA, ARTEMIS, HEPHAESTUS: data analysis for x-ray absorption spectroscopy using IFEFFIT. *J. Synchrotron Radiat.* **2005**, 12, 537-541.
26. It is worth noting the contrast between the C<sub>3</sub> molecular symmetry of P(NMePh)<sub>3</sub> and the C<sub>s</sub> molecular symmetry of the related homoleptic triamide P(NMe<sub>2</sub>)<sub>3</sub>, see: Mitzel, N. W.; Smart, B. A.; Dreihäupl, K.-H.; Rankin, D. W. H.; Schmidbaur, H. Low Symmetry in P(NR<sub>2</sub>)<sub>3</sub> Skeletons and Related Fragments: An Inherent Phenomenon. *J. Am. Chem. Soc.* **1996**, 118, 12673-12682.
27. Gaussian 09, Revision B.01, Frisch, M.J.; Trucks, G.W.; Schlegel, H.B.; Scuseria, G.E.; Robb, M.A.; Cheeseman, J.R.; Scalmani, G.; Barone, V.; Mennucci, B.; Petersson, G.A.; Nakatsuji, H.; Caricato, M.; Li, X.; Hratchian, H.P.; Izmaylov, A.F.; Bloino, J.; Zheng, G.; Sonnenberg, J.L.; Hada, M.; Ehara, M.; Toyota, K.; Fukuda, R.; Hasegawa, J.; Ishida, M.; Nakajima, T.; Honda, Y.; Kitao, O.; Nakai, H.; Vreven, T.; Montgomery, J.A., Jr.; Peralta, J.E.; Ogliaro, F.; Bearpark, M.; Heyd, J.J.; Brothers, E.; Kudin, K.N.; Staroverov, V.N.; Kobayashi, R.; Normand, J.; Raghavachari, K.; Rendell, A.; Burant, J.C.; Iyengar, S.S.; Tomasi, J.; Cossi, M.; Rega, N.; Millam, N.J.; Klene, M.; Knox, J.E.; Cross, J.B.; Bakken, V.; Adamo, C.; Jaramillo, J.; Gomperts, R.; Stratmann, R.E.; Yazyev, O.; Austin, A.J.; Cammi, R.; Pomelli, C.; Ochterski, J. W.; Martin, R.L.; Morokuma, K.; Zakrzewski, V.G.; Voth, G.A.; Salvador, P.; Dannenberg, J.J.; Dapprich, S.; Daniels, A.D.; Farkas, Ö.; Foresman, J.B.; Ortiz, J.V.; Cioslowski, J.; Fox, D.J. Gaussian, Inc., Wallingford CT, 2009.
28. Becke, A. D. Density-Functional Thermochemistry. III. The Role of Exact Exchange. *J. Chem. Phys.* **1993**, 98, 5648-5652.
29. Lee, C.; Yang, W.; Parr, R. G. Development of the Colle-Salvetti Correlation-Energy Formula into a Functional of the Electron Density. *Phys. Rev. B Condens. Matter* **1988**, 37, 785-789.
30. Grimme, S.; Antony, J.; Ehrlich, S.; Krieg, H. A Consistent and Accurate Ab Initio Parametrization of Density Functional Dispersion Correction (DFT-D) for the 94 Elements H-Pu. *J. Chem. Phys.* **2010**, 132, 154104/154101-154104/154119.
31. Hehre, W. J.; Ditchfield, R.; Pople, J. A. Self-Consistent Molecular Orbital Methods. XII. Further Extensions of Gaussian-Type Basis Sets for Use in Molecular Orbital Studies of Organic Molecules. *J. Chem. Phys.* **1972**, 56, 2257-2261.
32. Hariharan, P. C.; Pople, J. A. Influence of Polarization Functions on MO Hydrogenation Energies. *Theor. Chim. Acta* **1973**, 28, 213-222.

33. Hay, P. J.; Wadt, W. R. Ab Initio Effective Core Potentials for Molecular Calculations. Potentials for Potassium to Gold Including the Outermost Core Orbitals. *J. Chem. Phys.* **1985**, *82*, 299-310.
34. Roy, L. E.; Hay, P. J.; Martin, R. L. Revised Basis Sets for the LANL Effective Core Potentials. *J. Chem. Theory Comput.* **2008**, *4*, 1029-1031.
35. Ehlers, A. W.; Boehme, M.; Dapprich, S.; Gobbi, A.; Hoellwarth, A.; Jonas, V.; Koehler, K. F.; Stegmann, R.; Veldkamp, A.; et al. A Set of f-Polarization Functions for Pseudopotential Basis Sets of the Transition Metals Sc-Cu, Y-Ag and La-Au. *Chem. Phys. Lett.* **1993**, *208*, 111-114.
36. Martin, R. L. Natural Transition Orbitals. *J. Chem. Phys.* **2003**, *118*, 4775-4777.
